# Supplementary material for: Enigmatic Orthology Relationships between Hox Clusters of the African Butterfly Fish and Other Teleosts Following Ancient Whole-Genome Duplication
Source: PubMed Central journal article supplement (PMC4166920; doi:10.1093/molbev/msu202), 2014-06-27
Supplement: supp_msu202_msu202_SI_FigS3_VISTA_alignments_FigS4_CNE_histogram-KM.pdf [file supp_msu202_msu202_SI_FigS3_VISTA_alignments_FigS4_CNE_histogram-KM.pdf]

HoxA VISTA alignment with *C. milli* baseline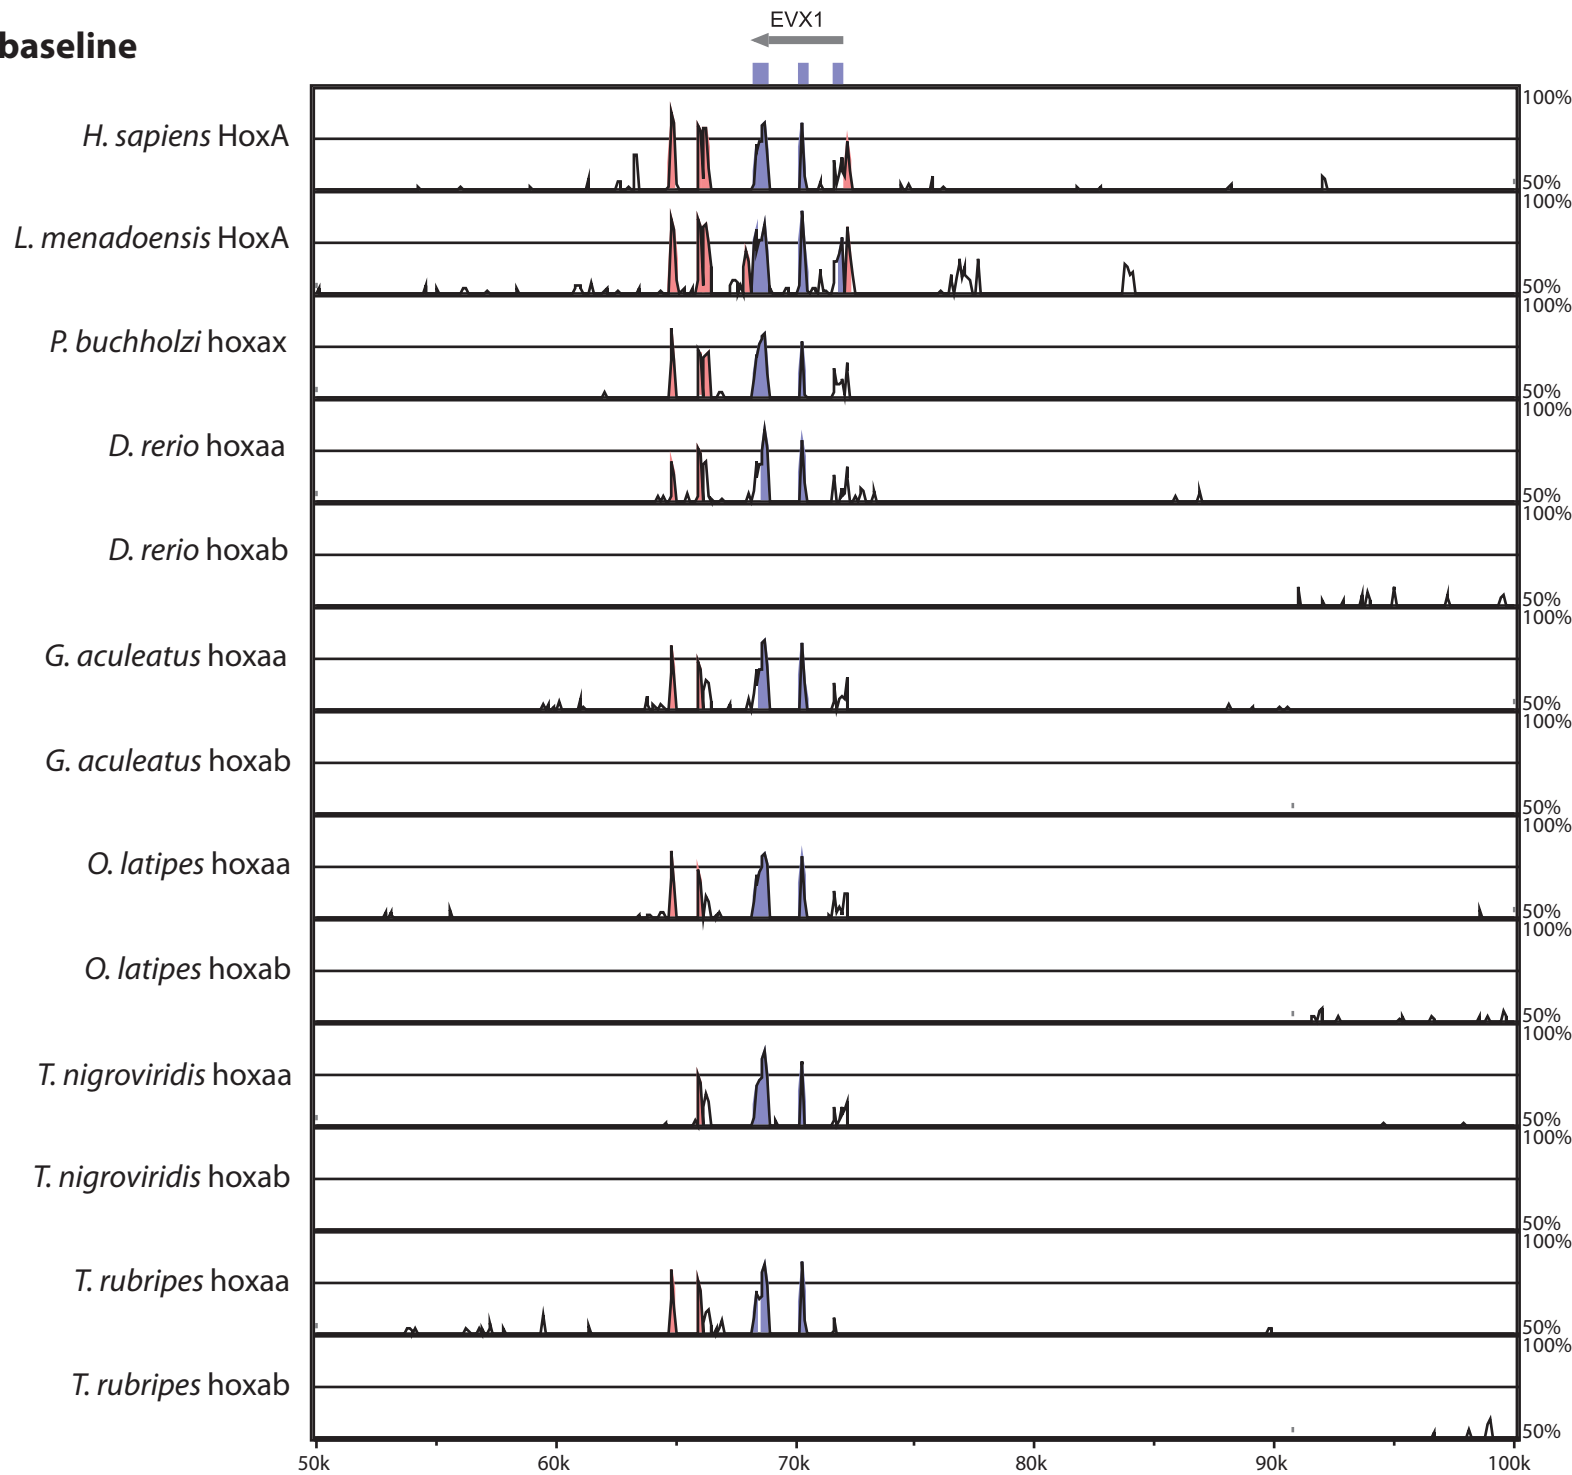



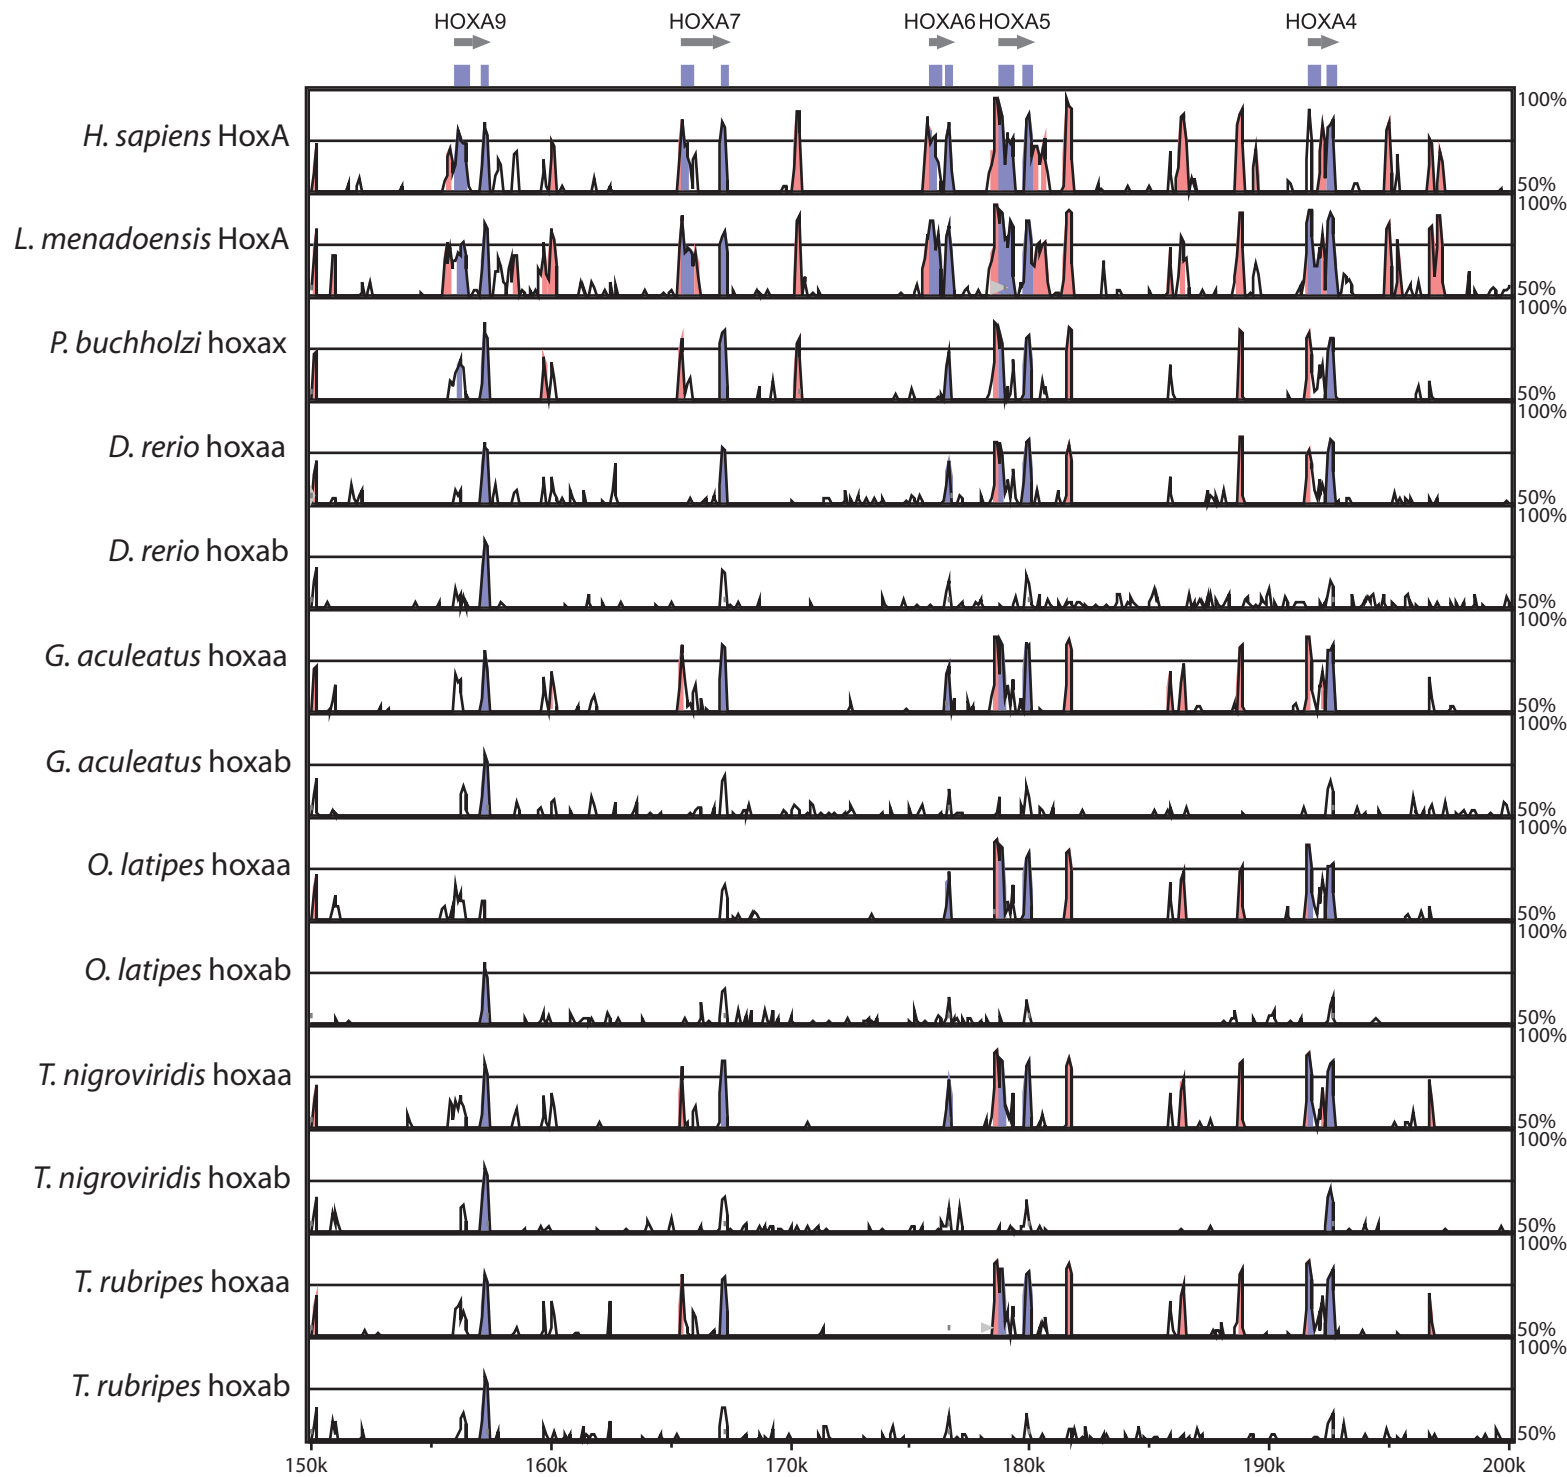

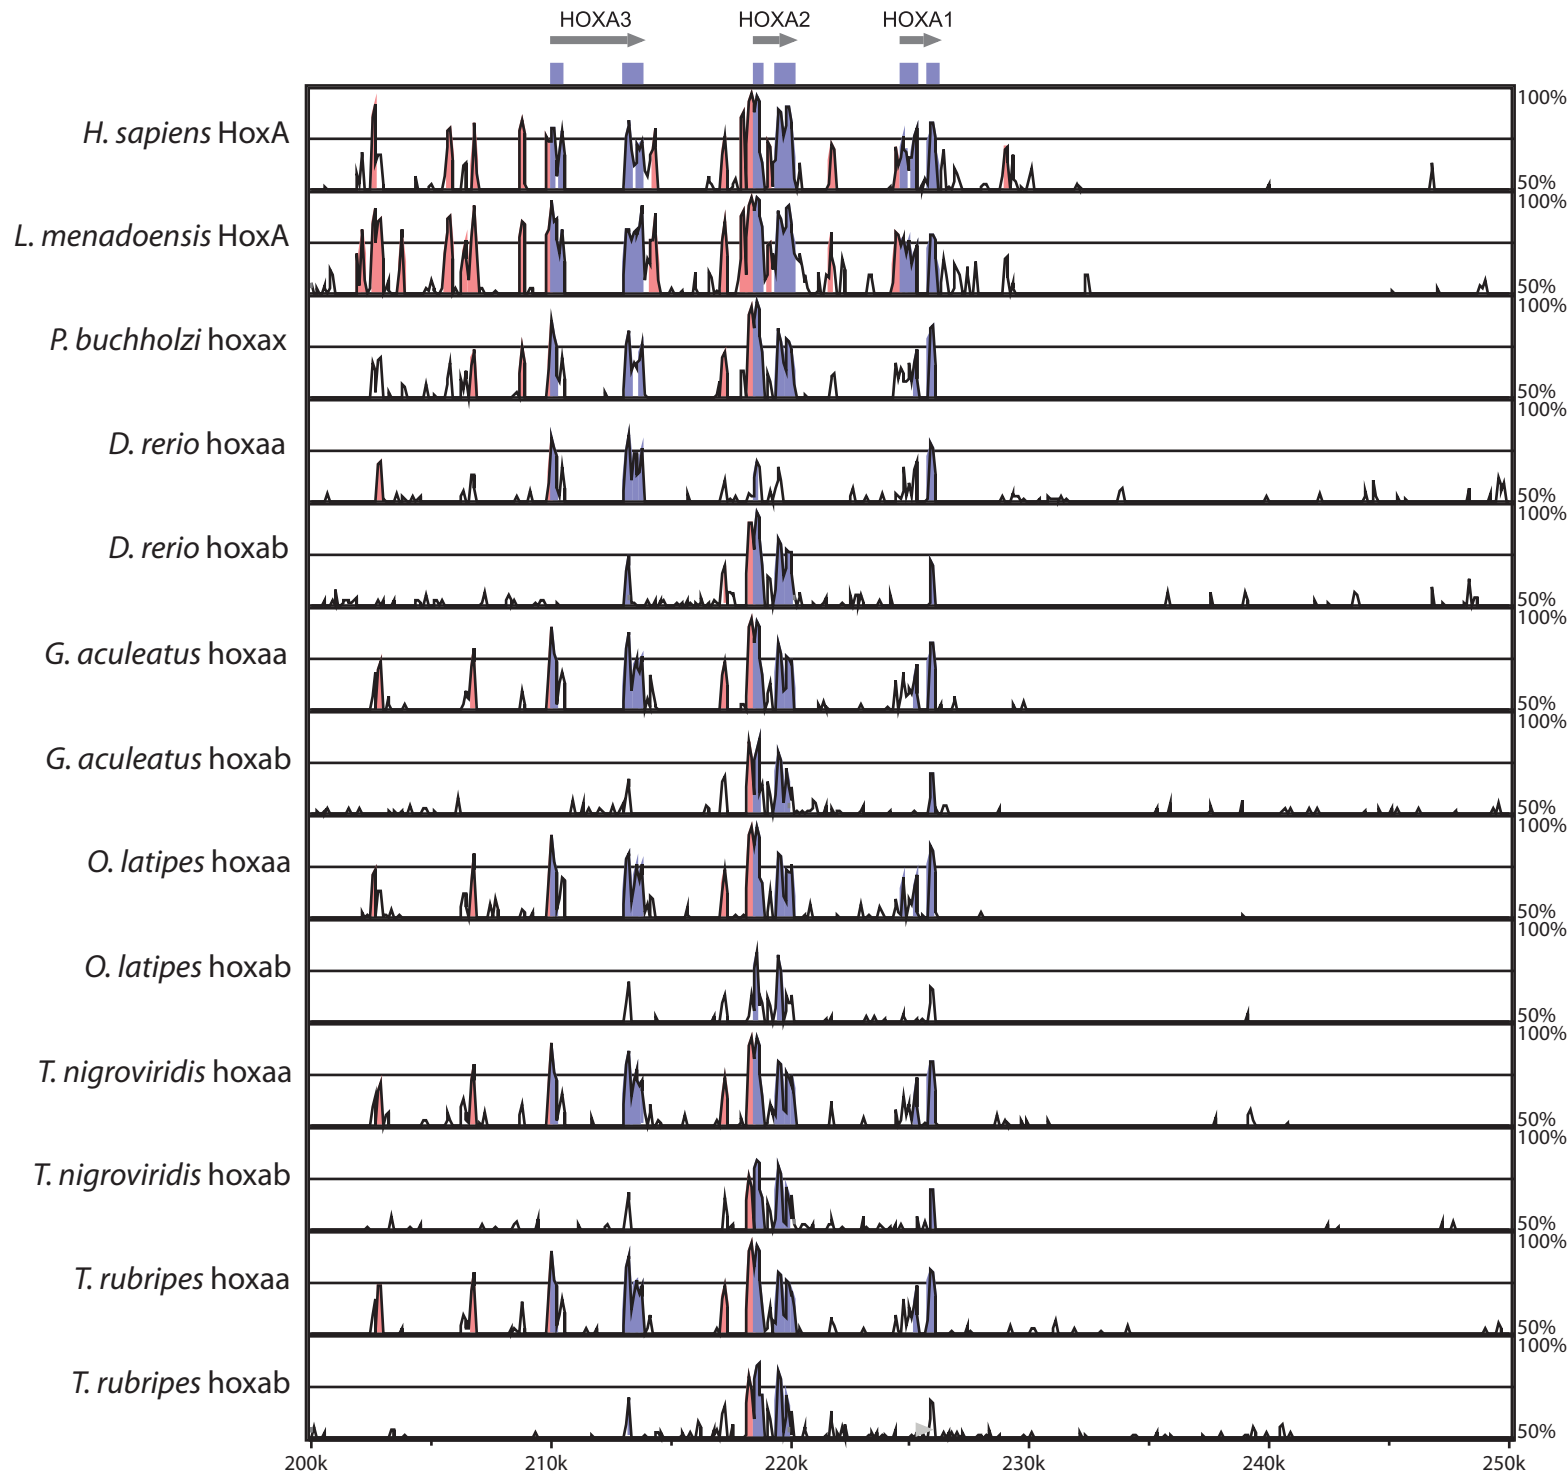

HoxB VISTA alignment with *C. milli* baseline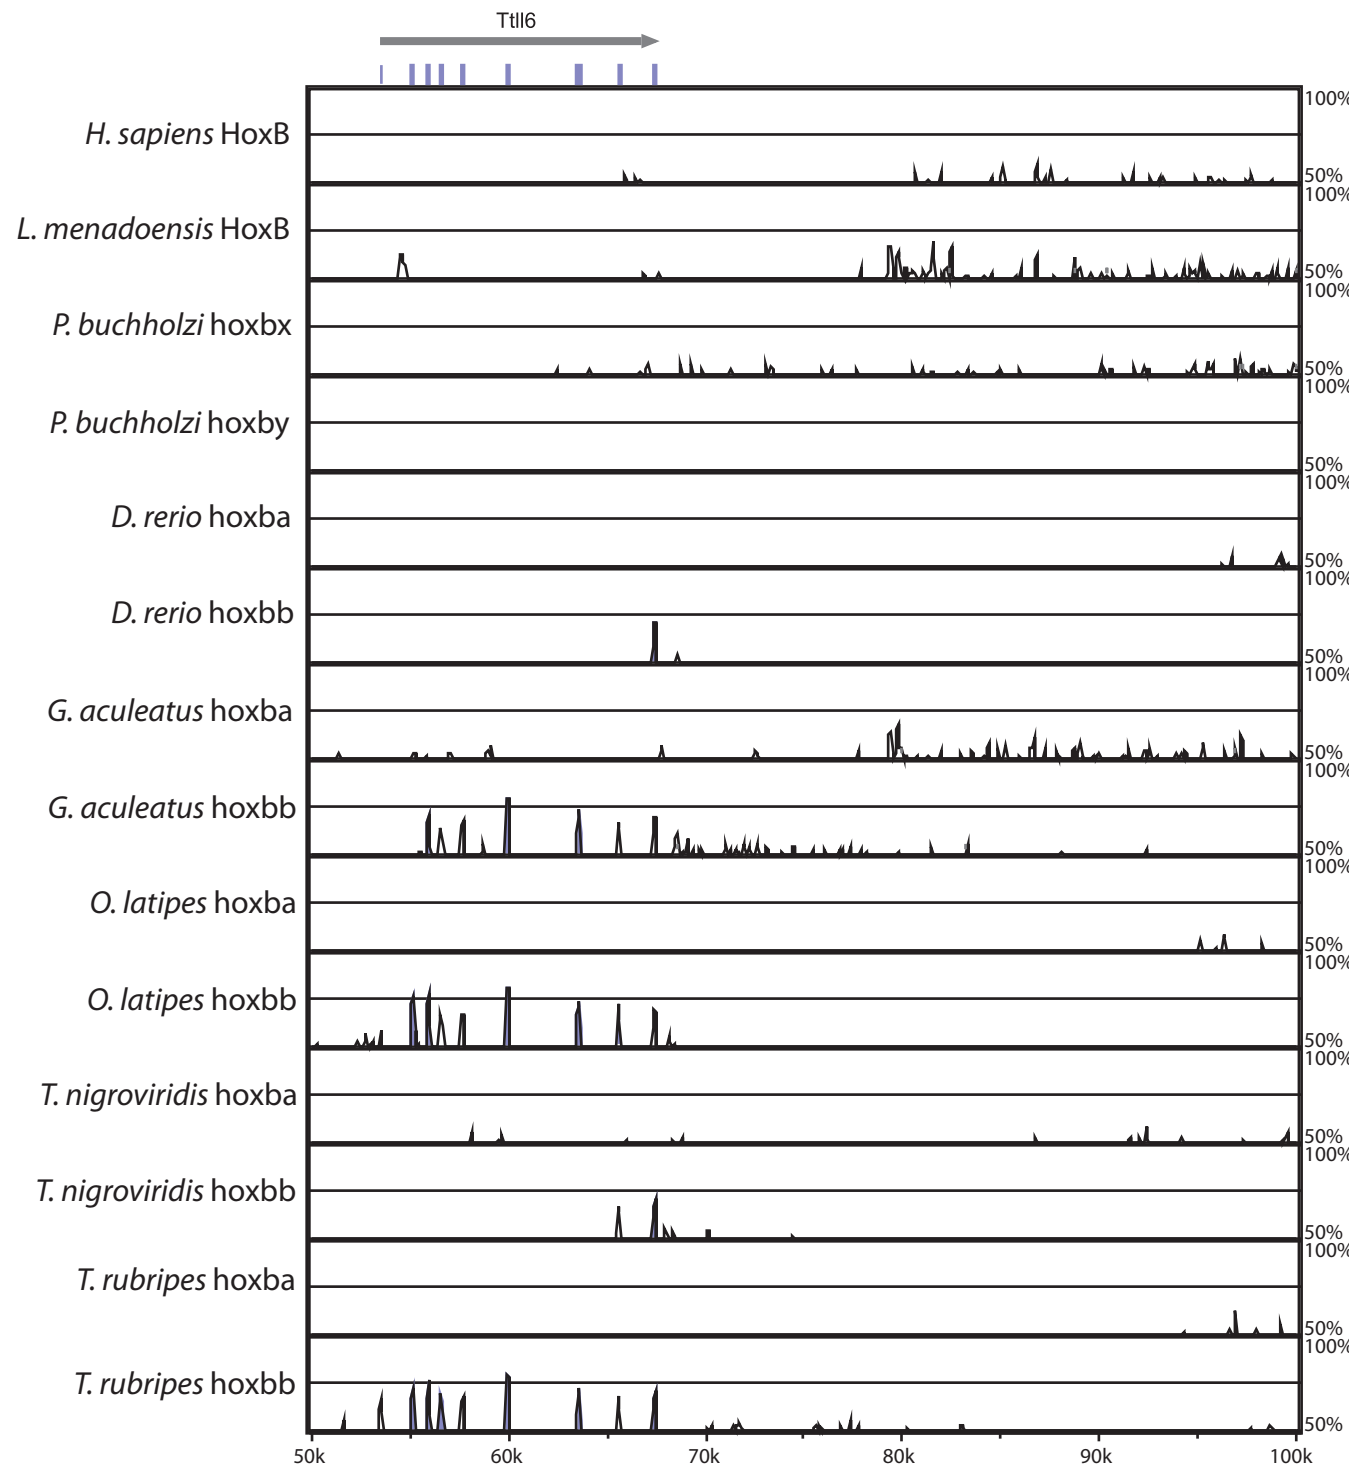

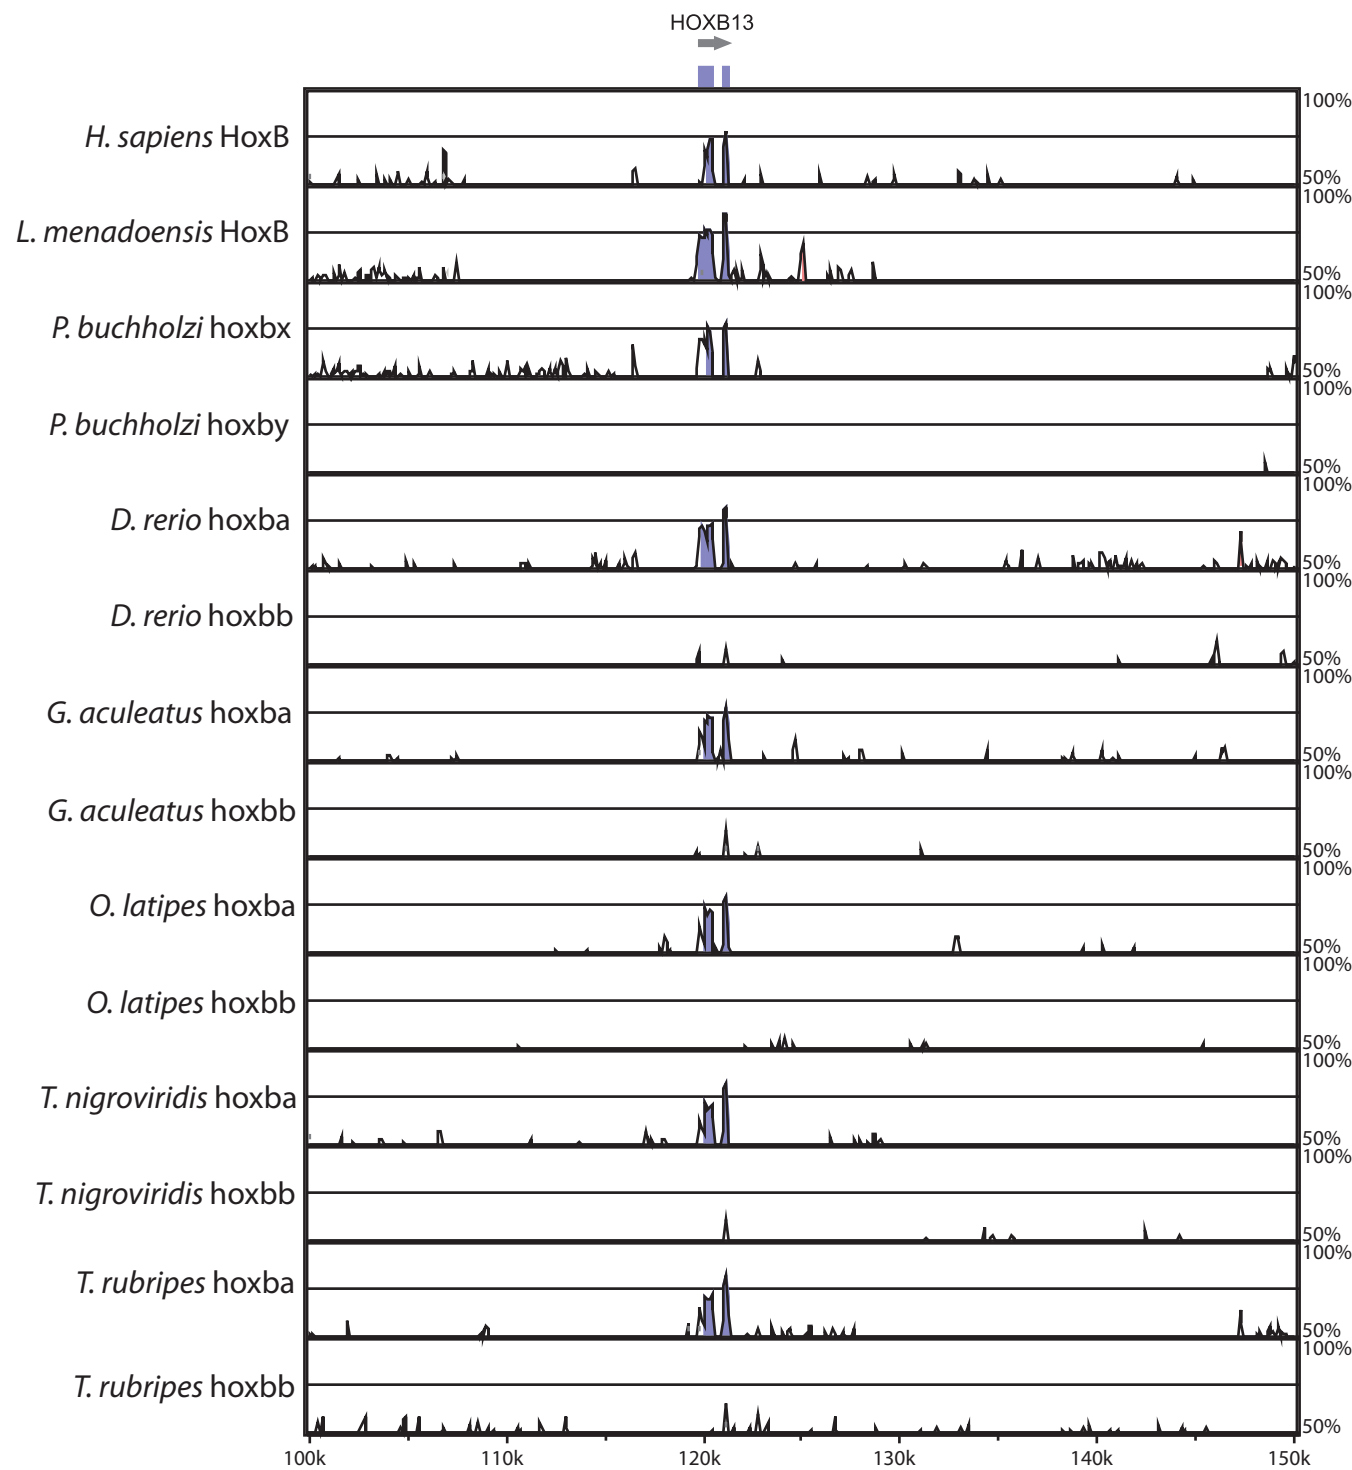

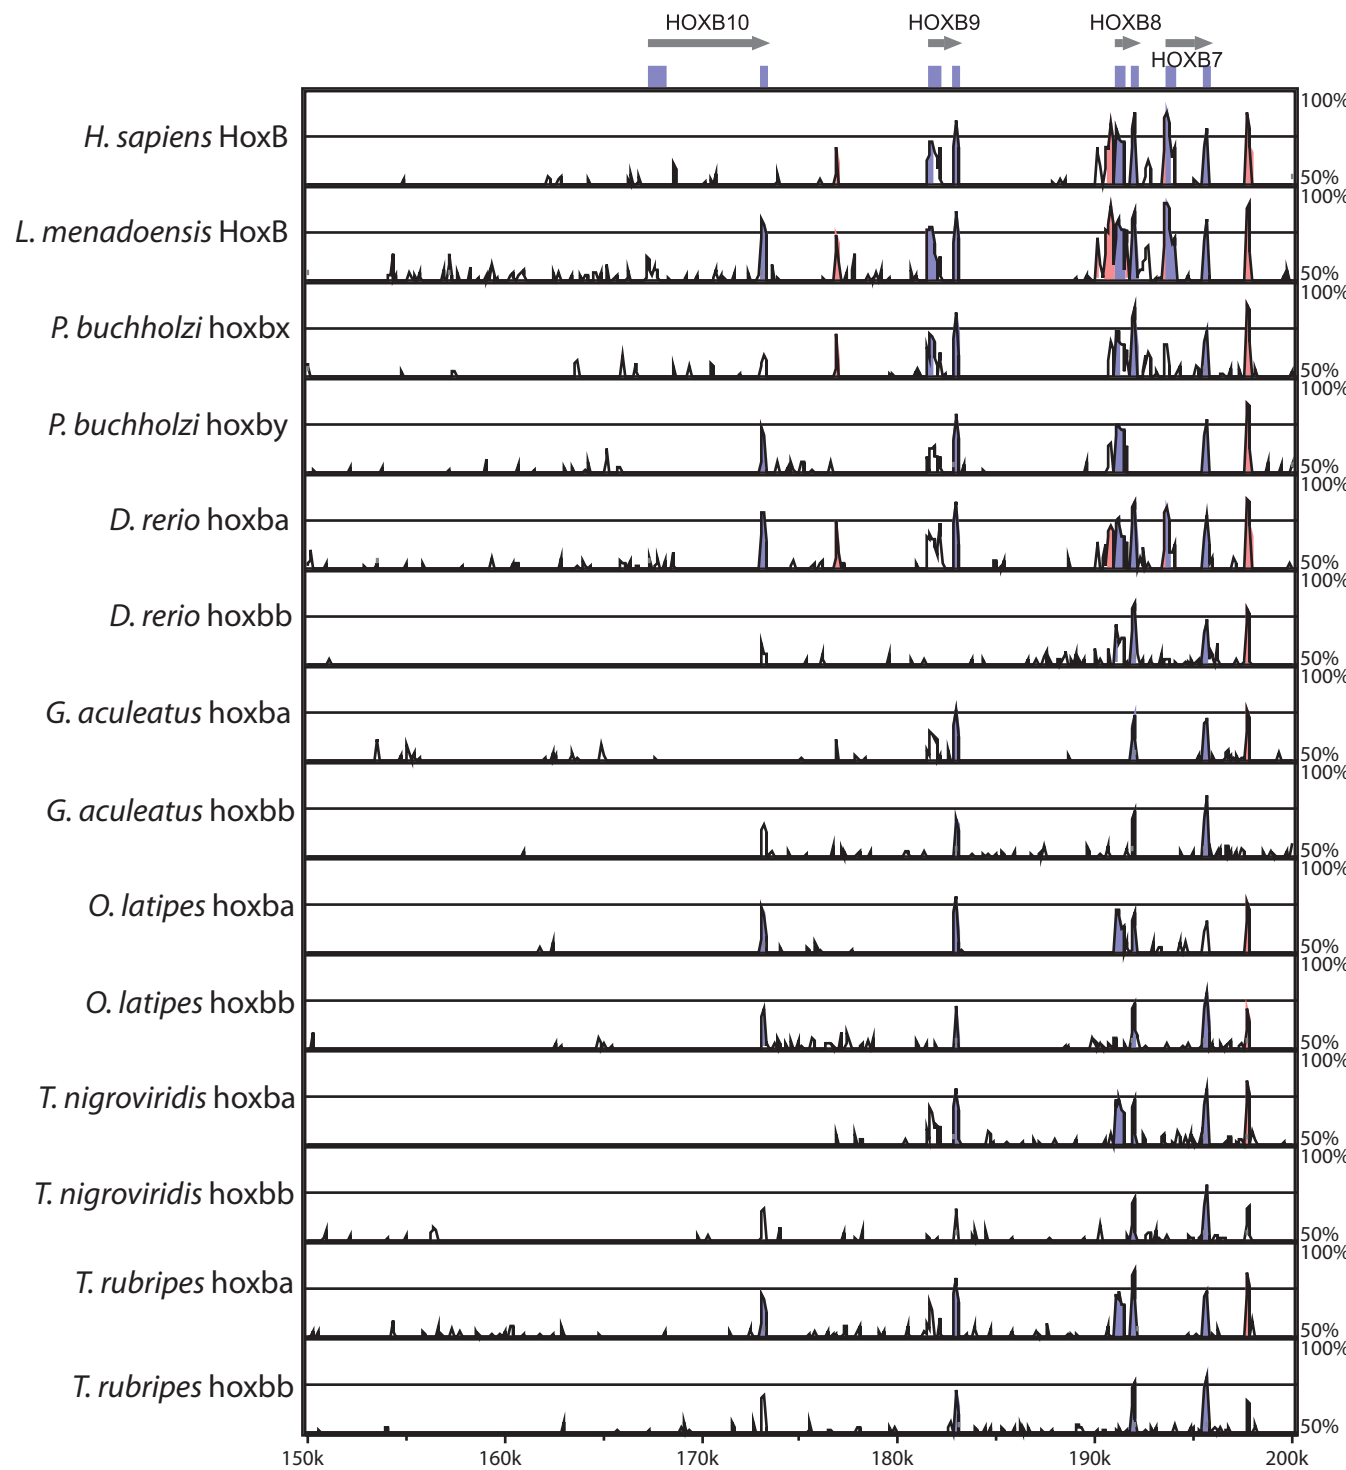

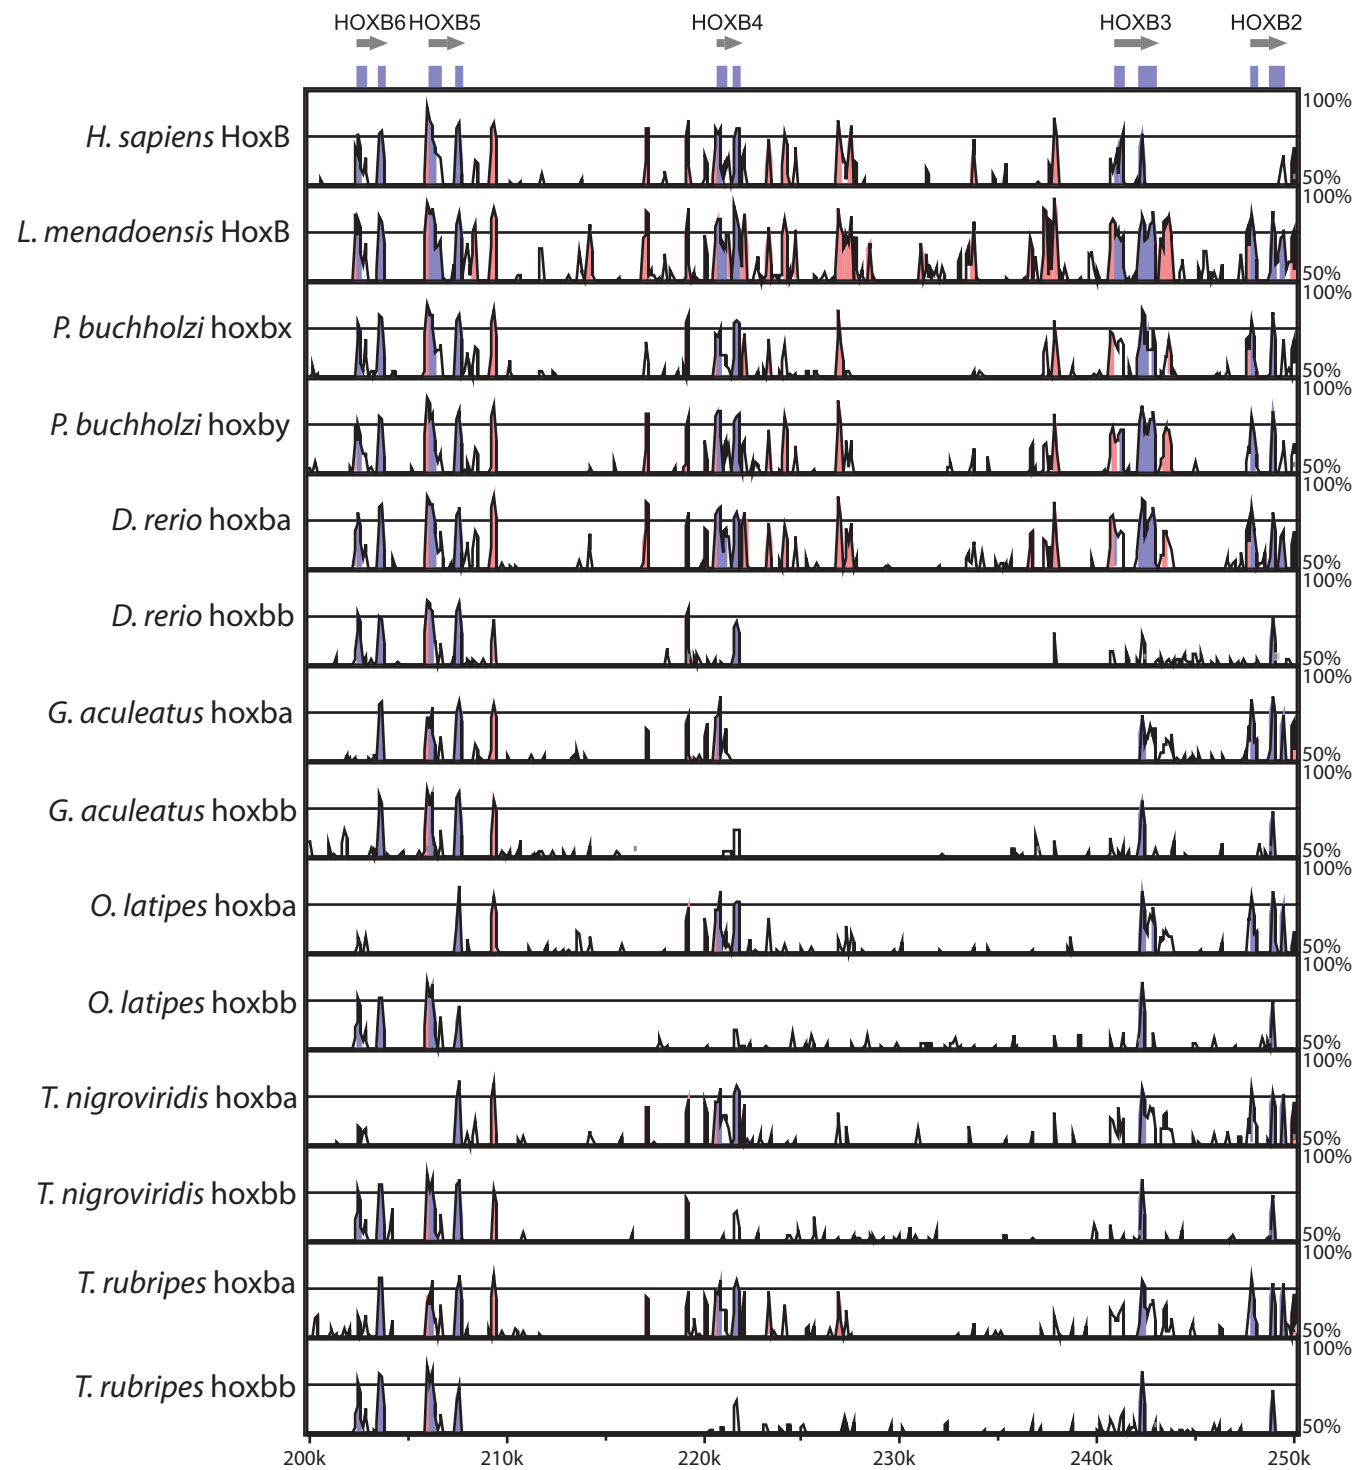



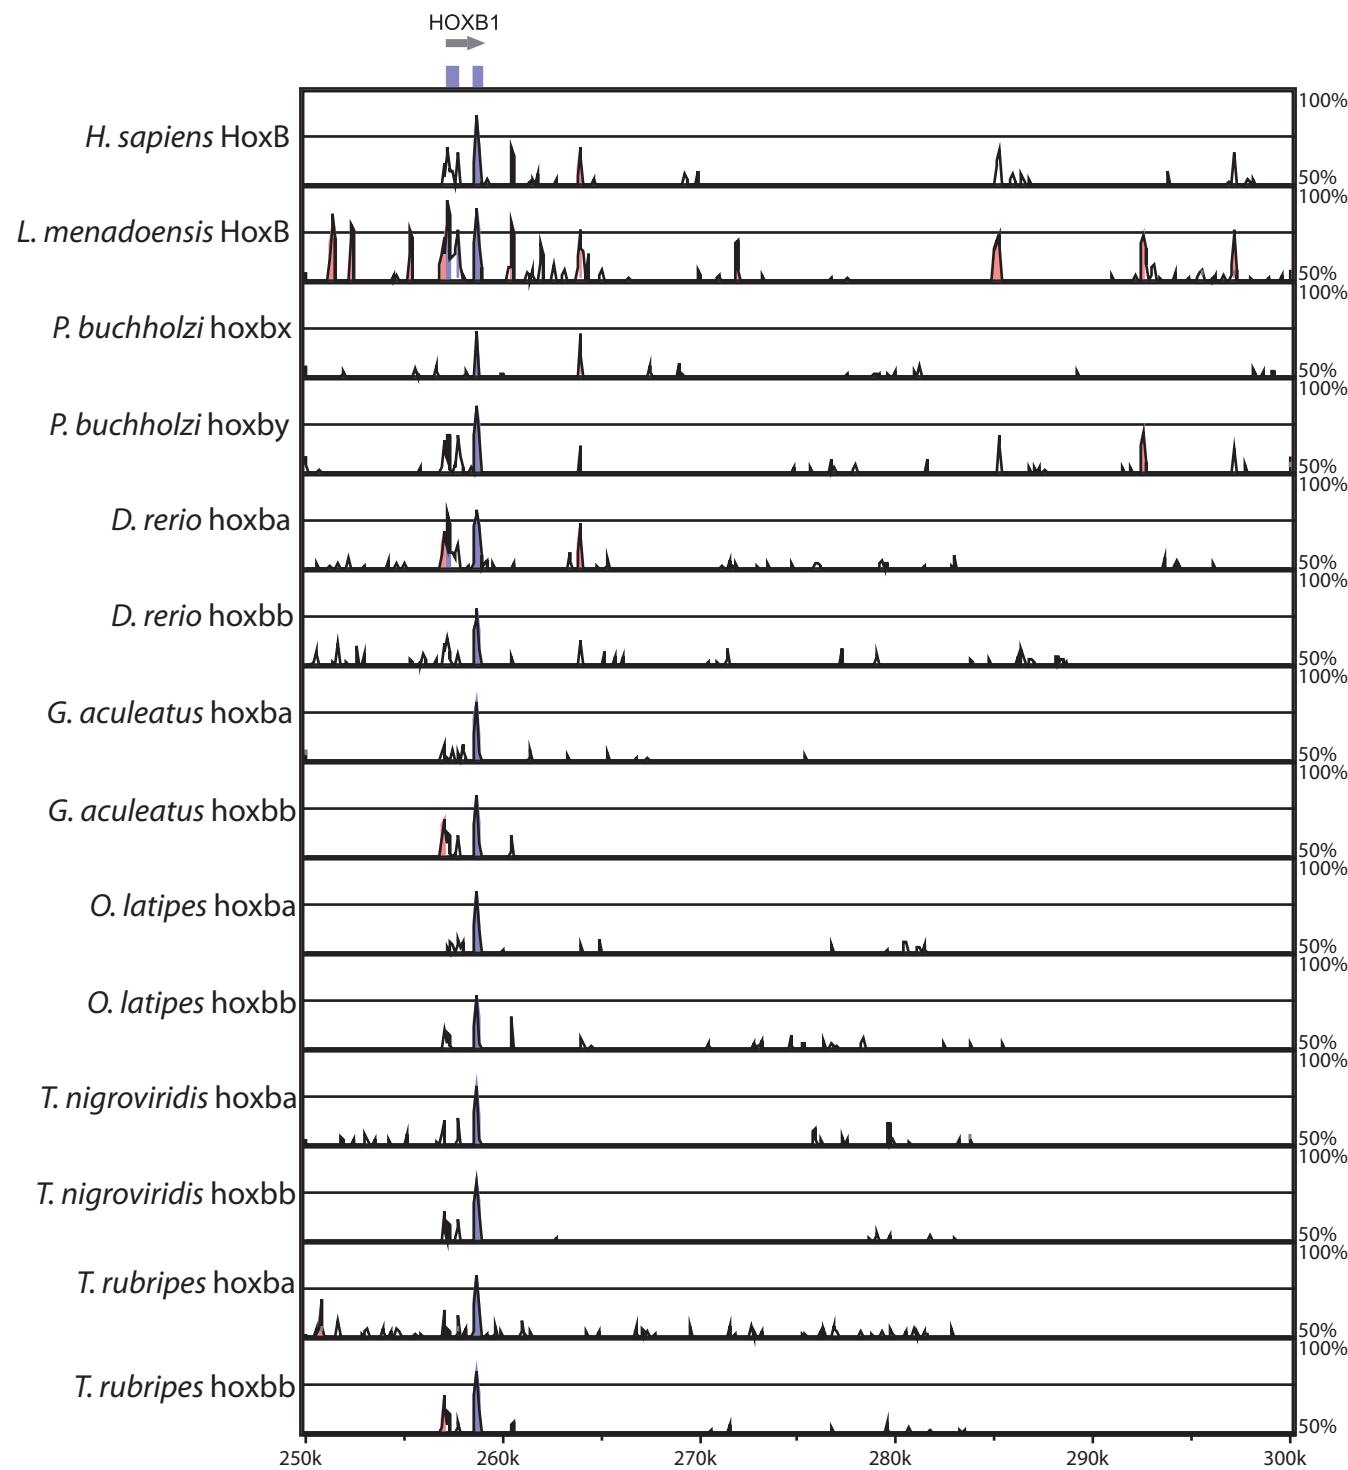

HoxC VISTA alignment with *C. milli* baseline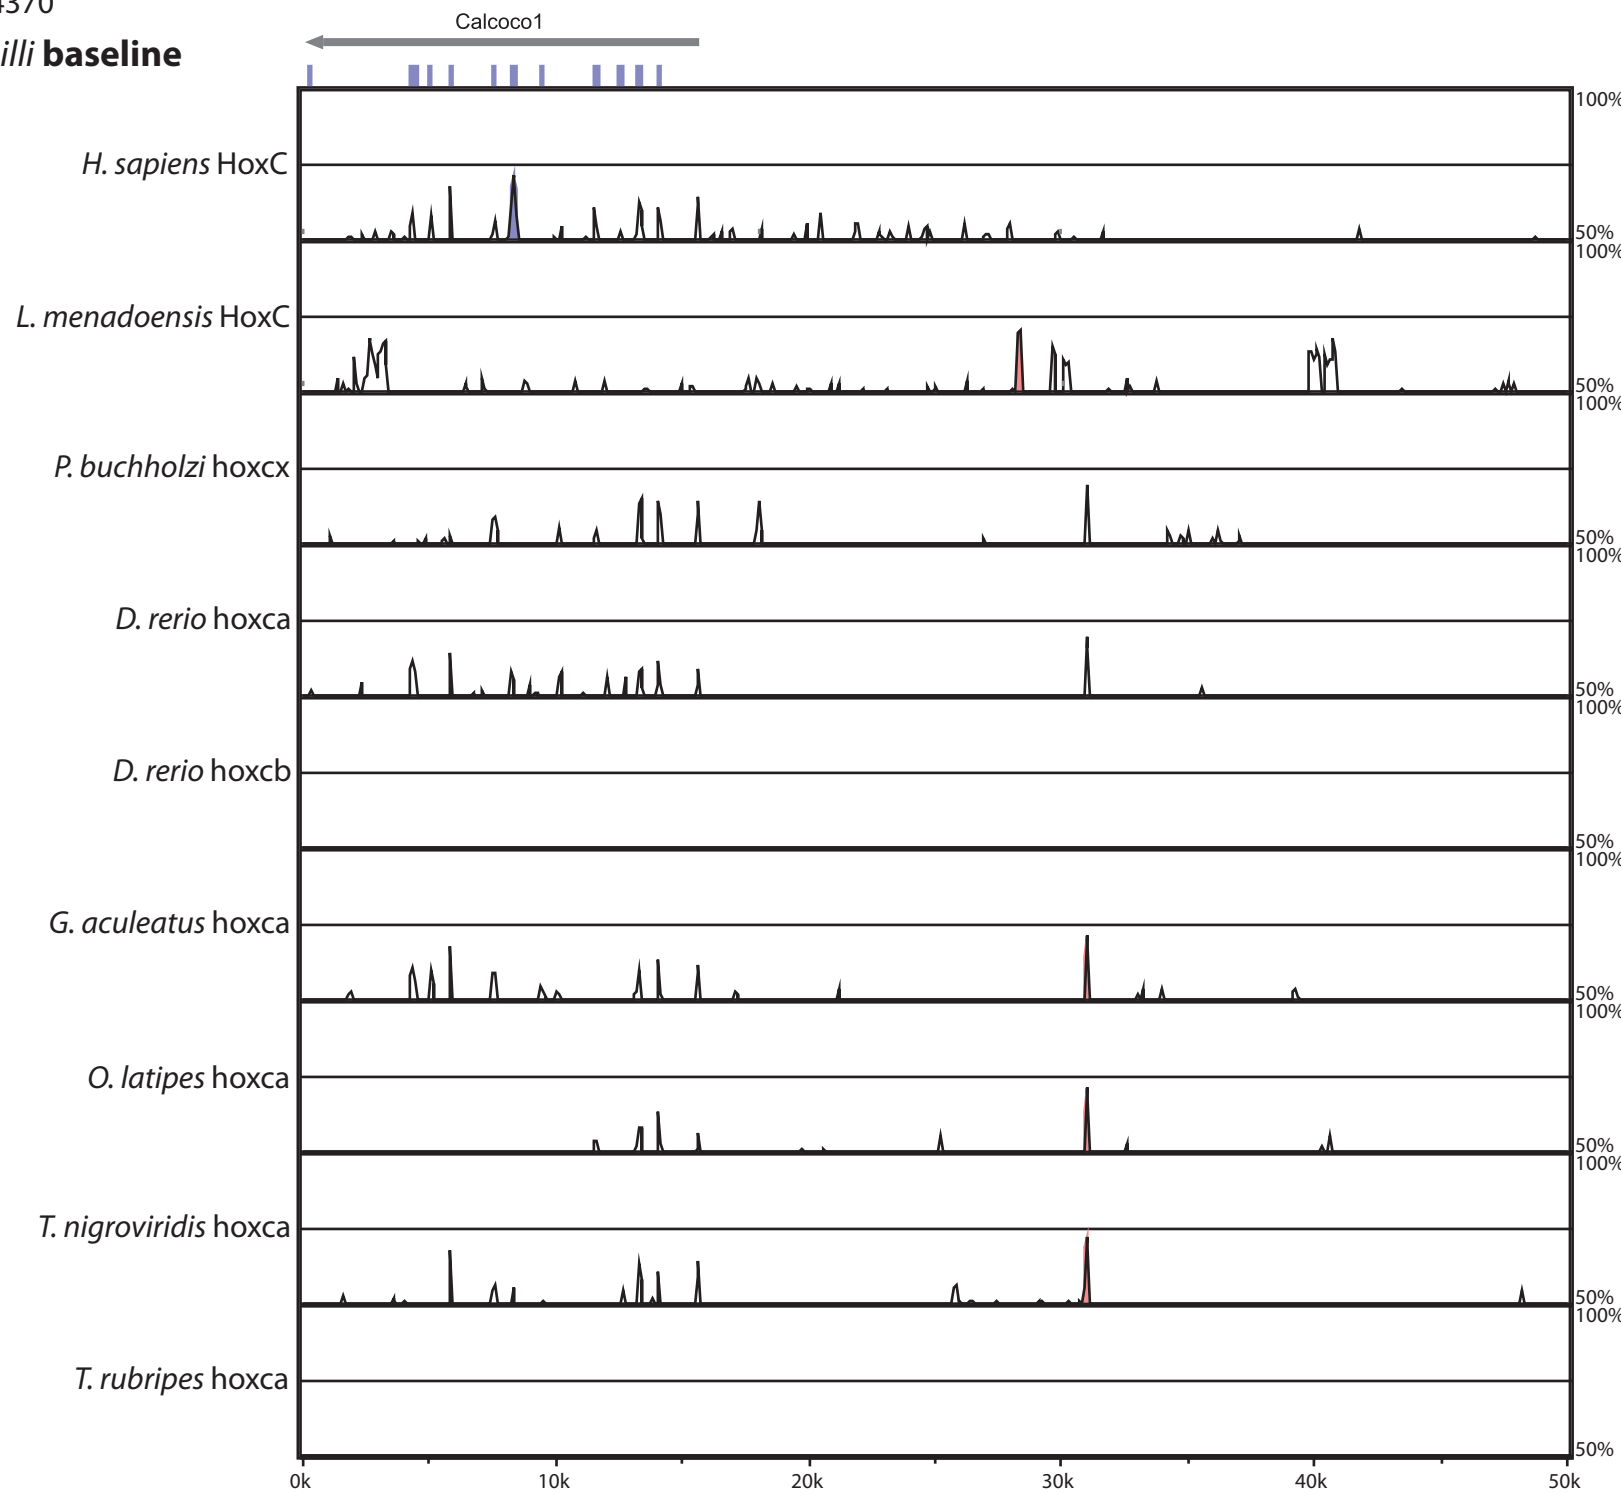

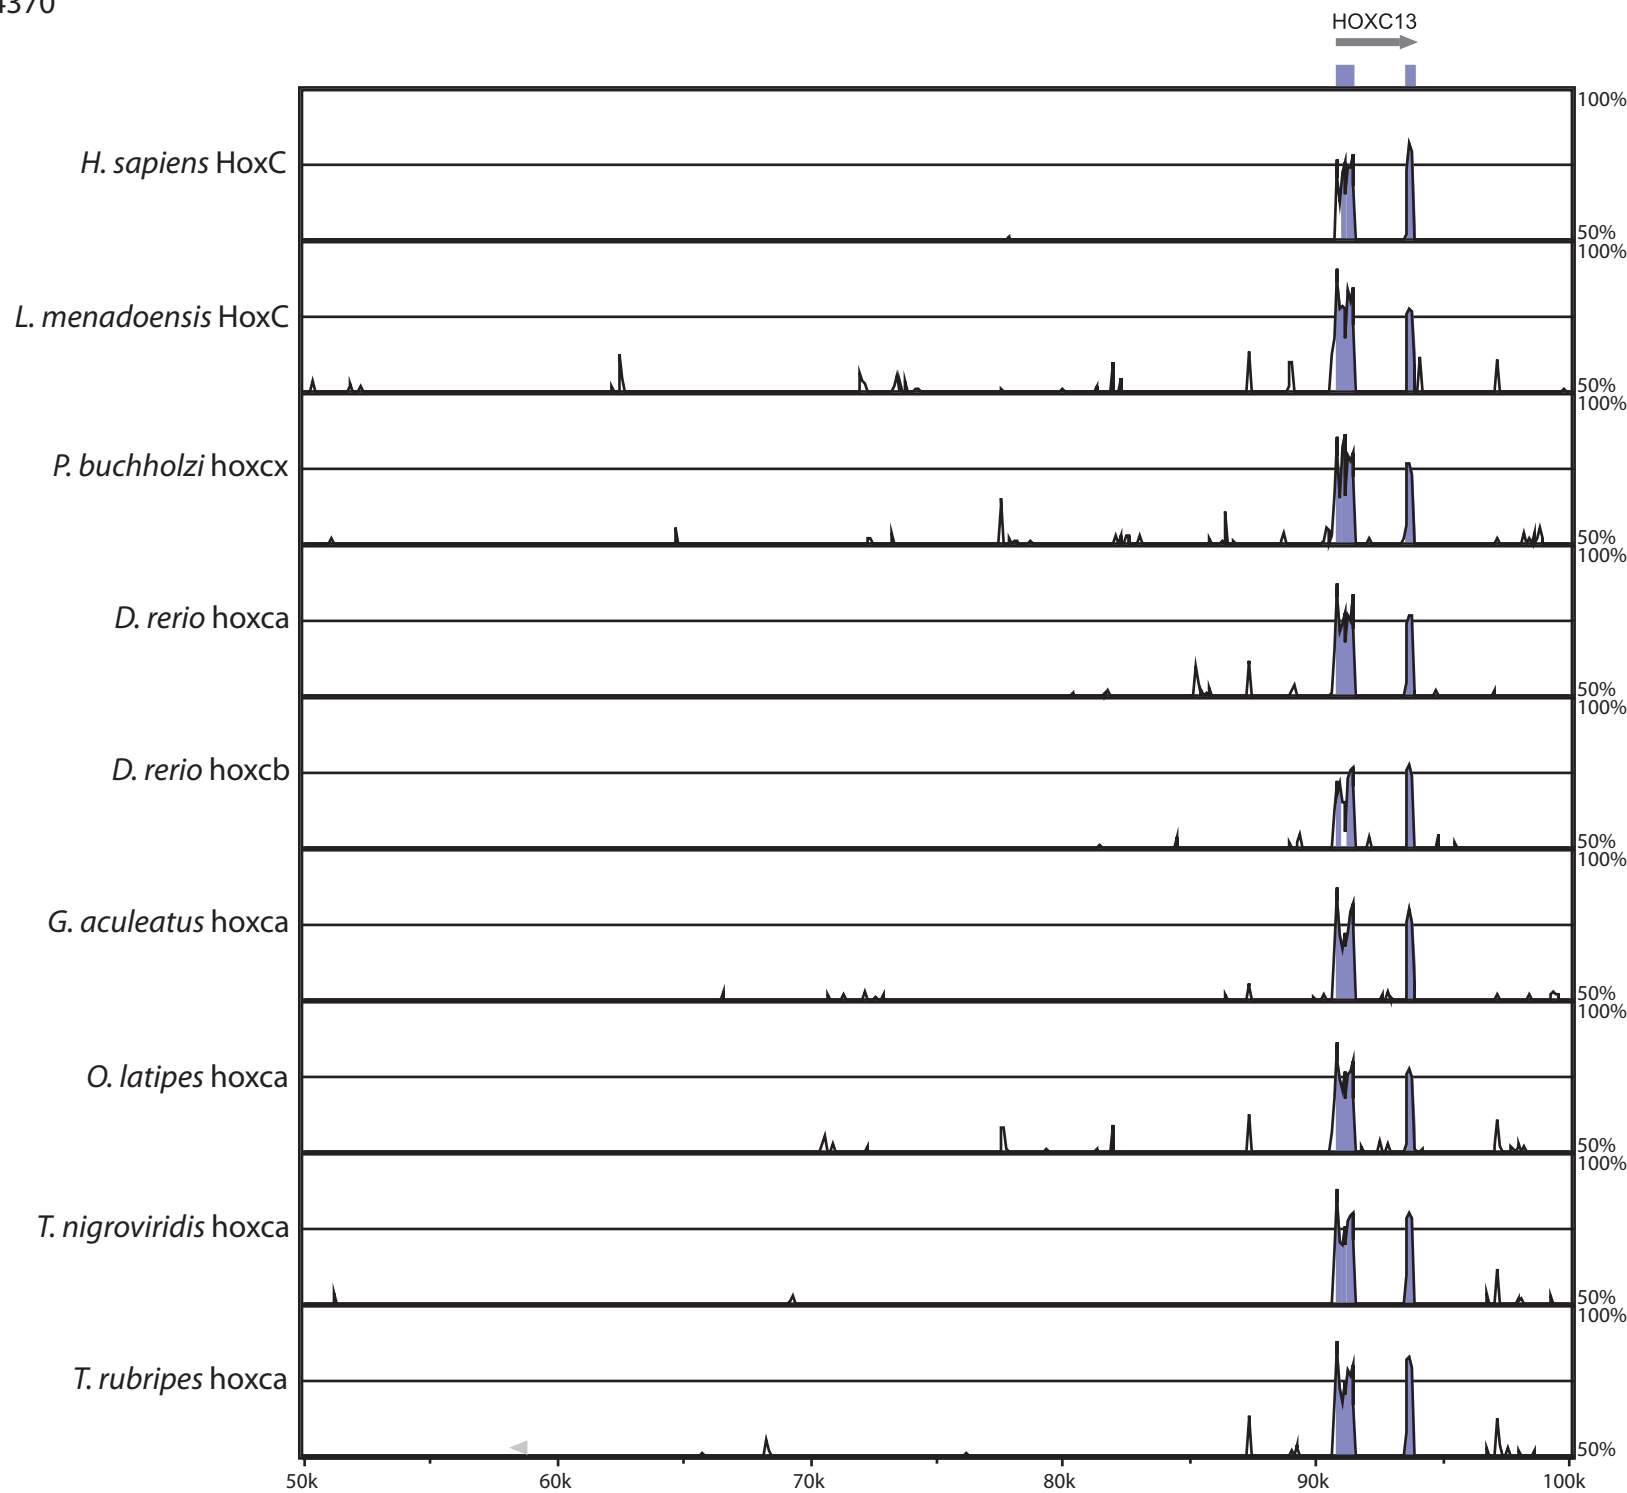

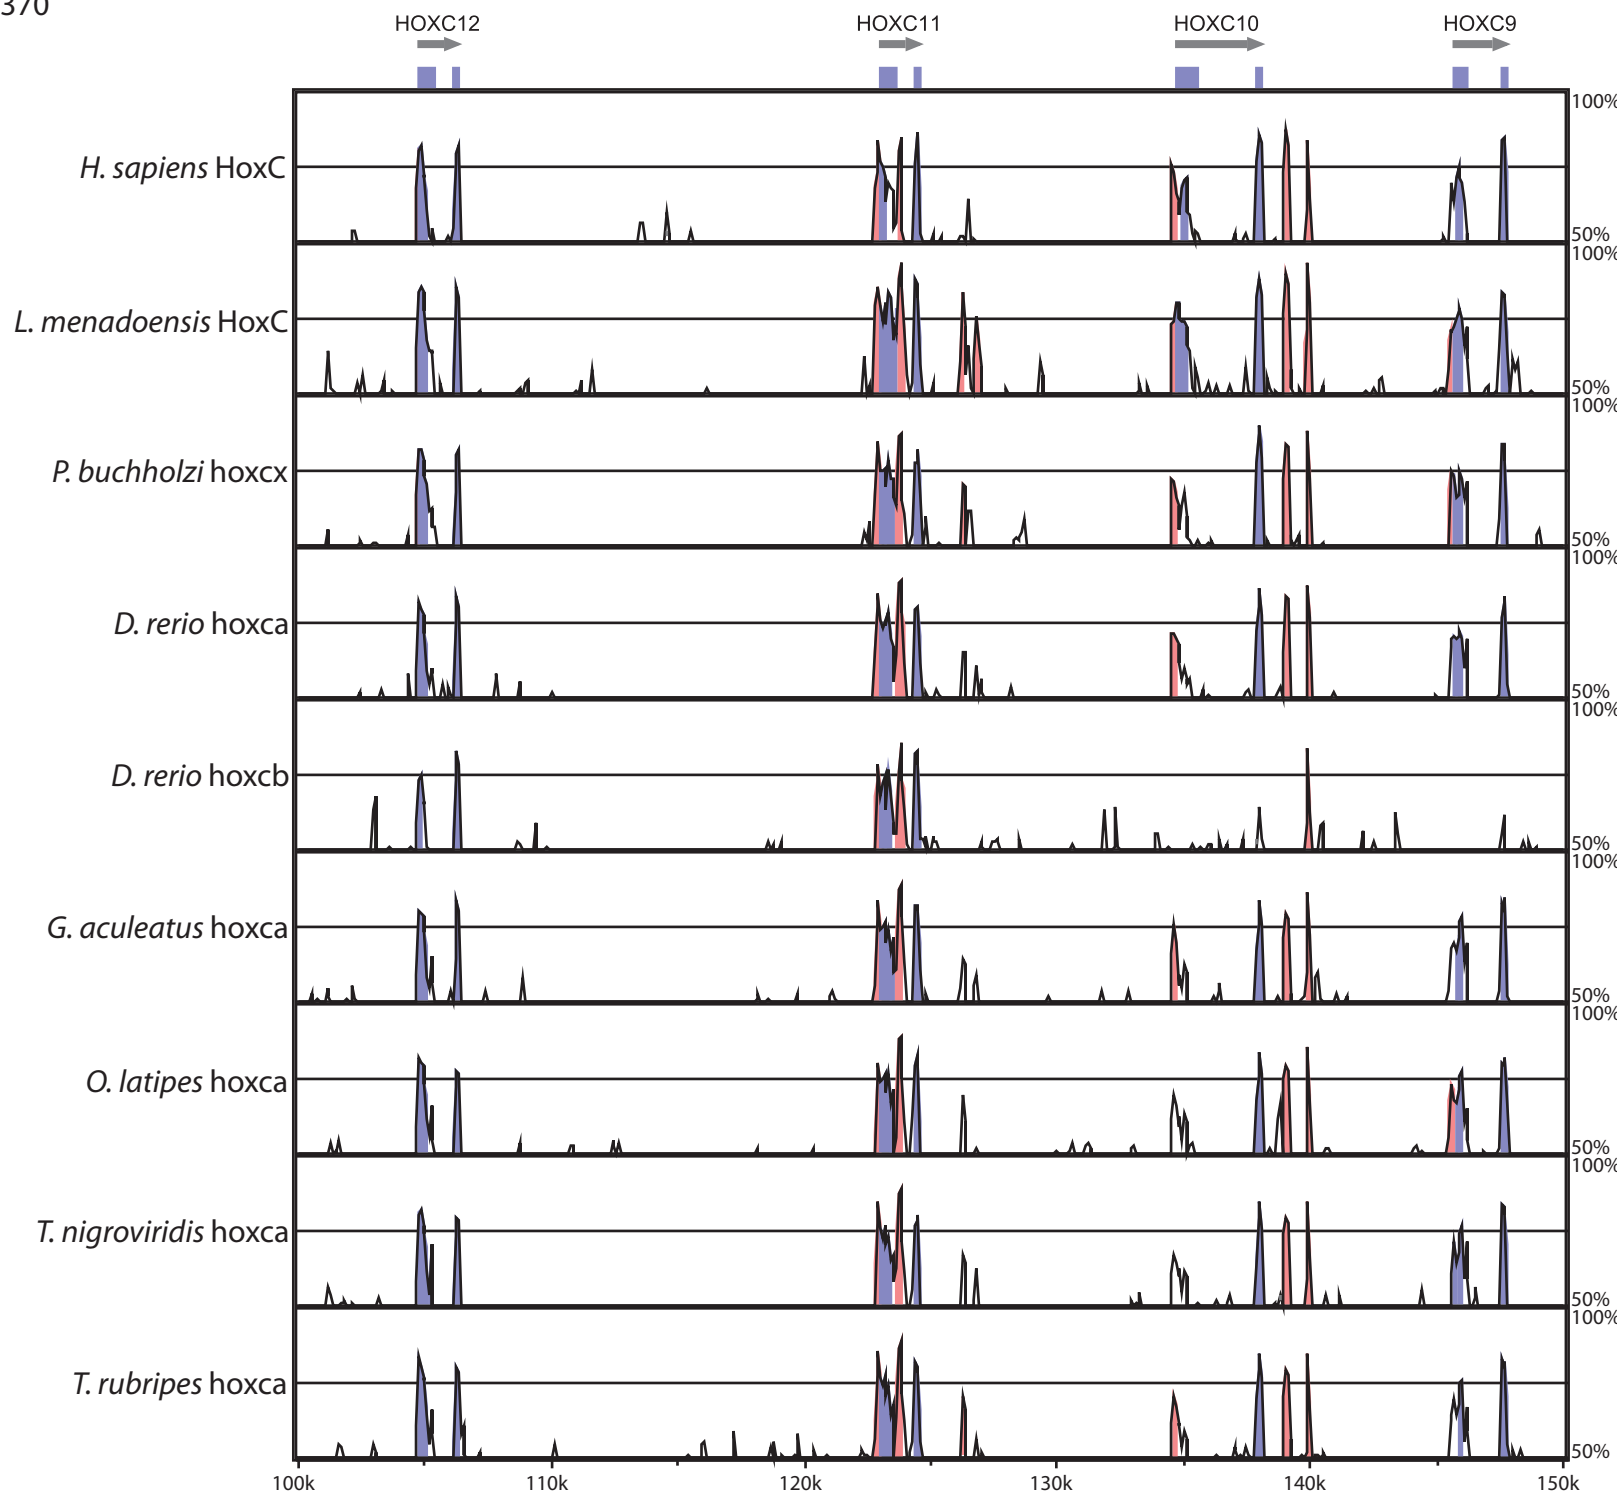

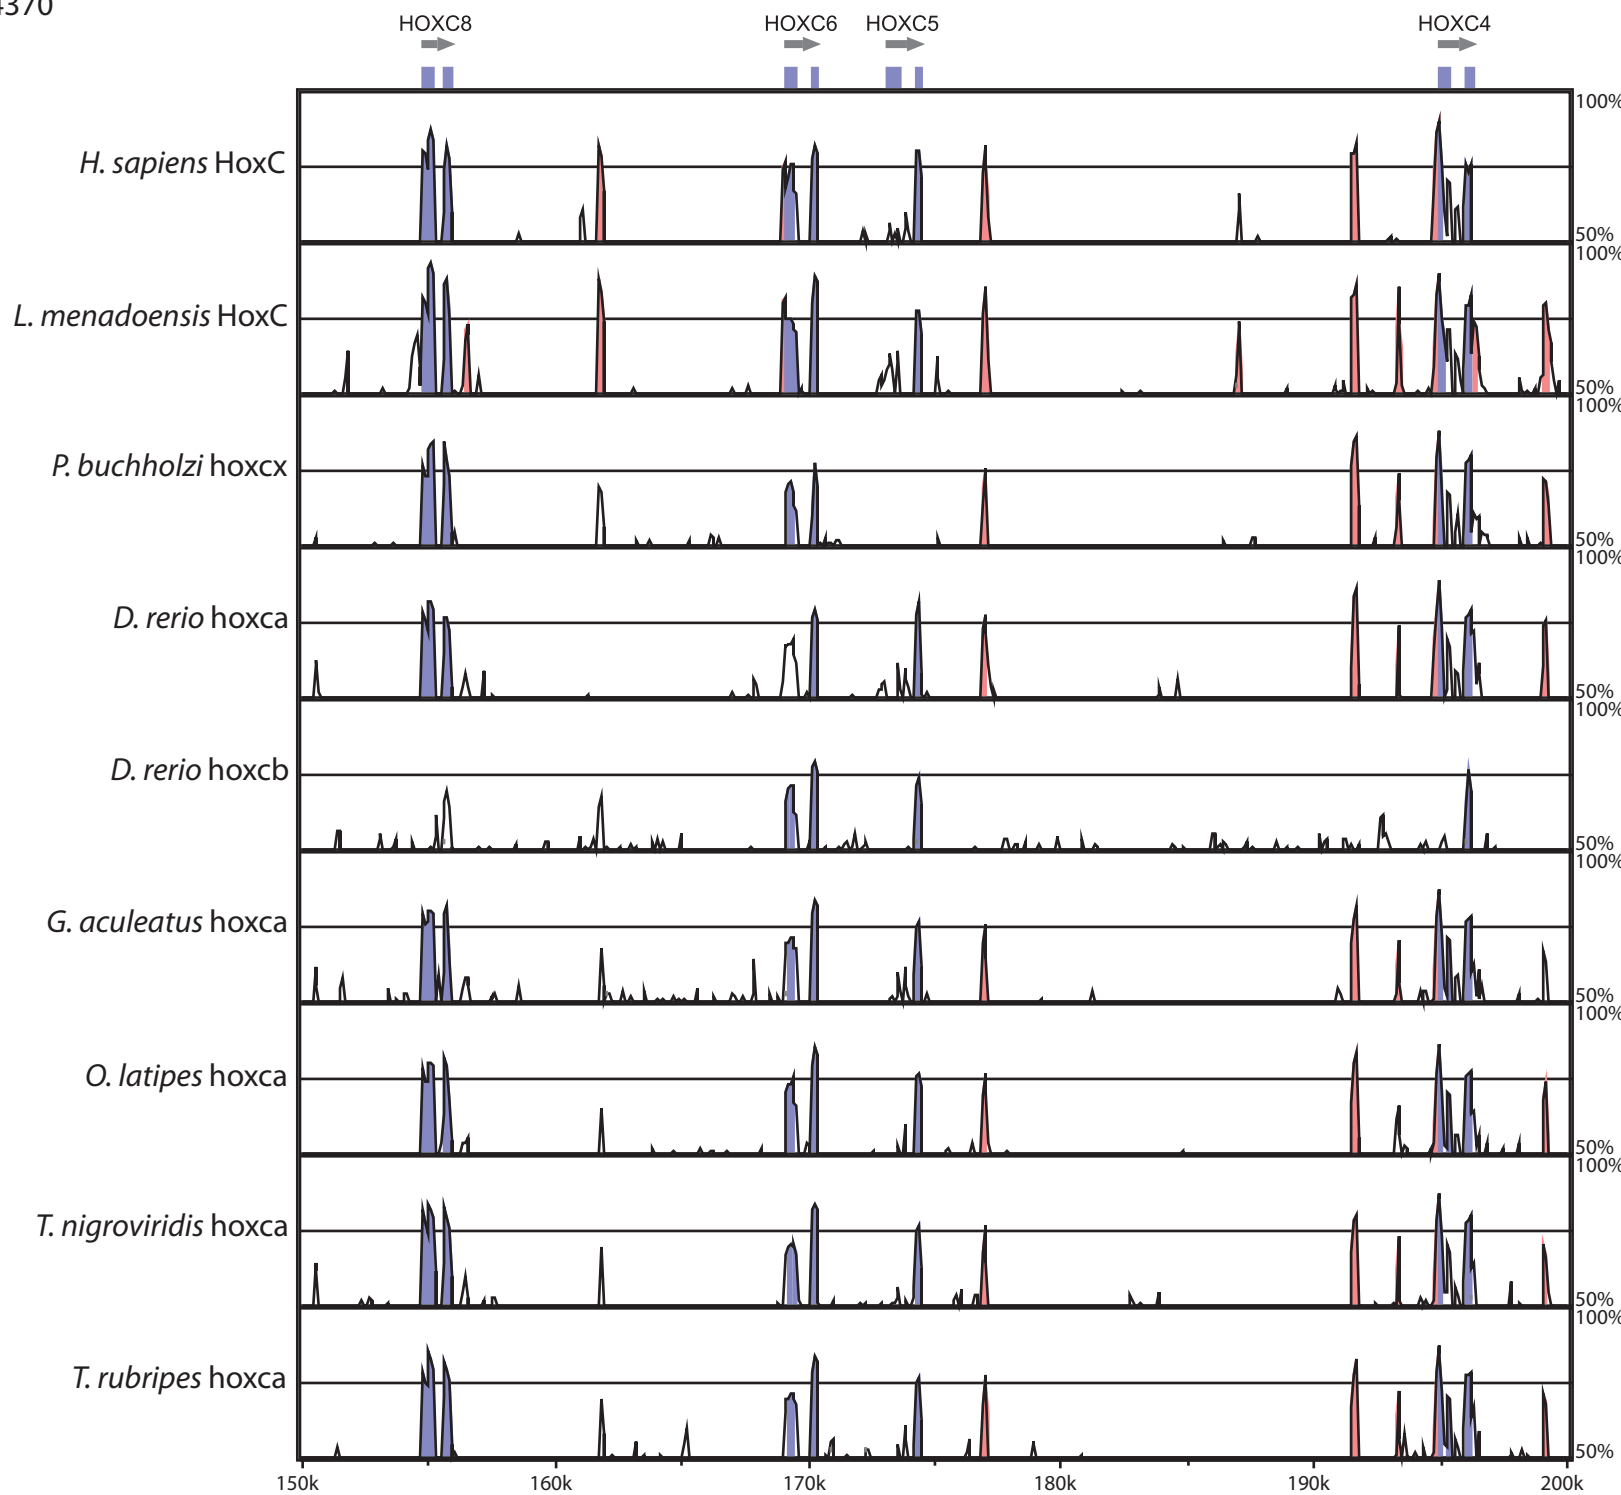

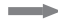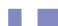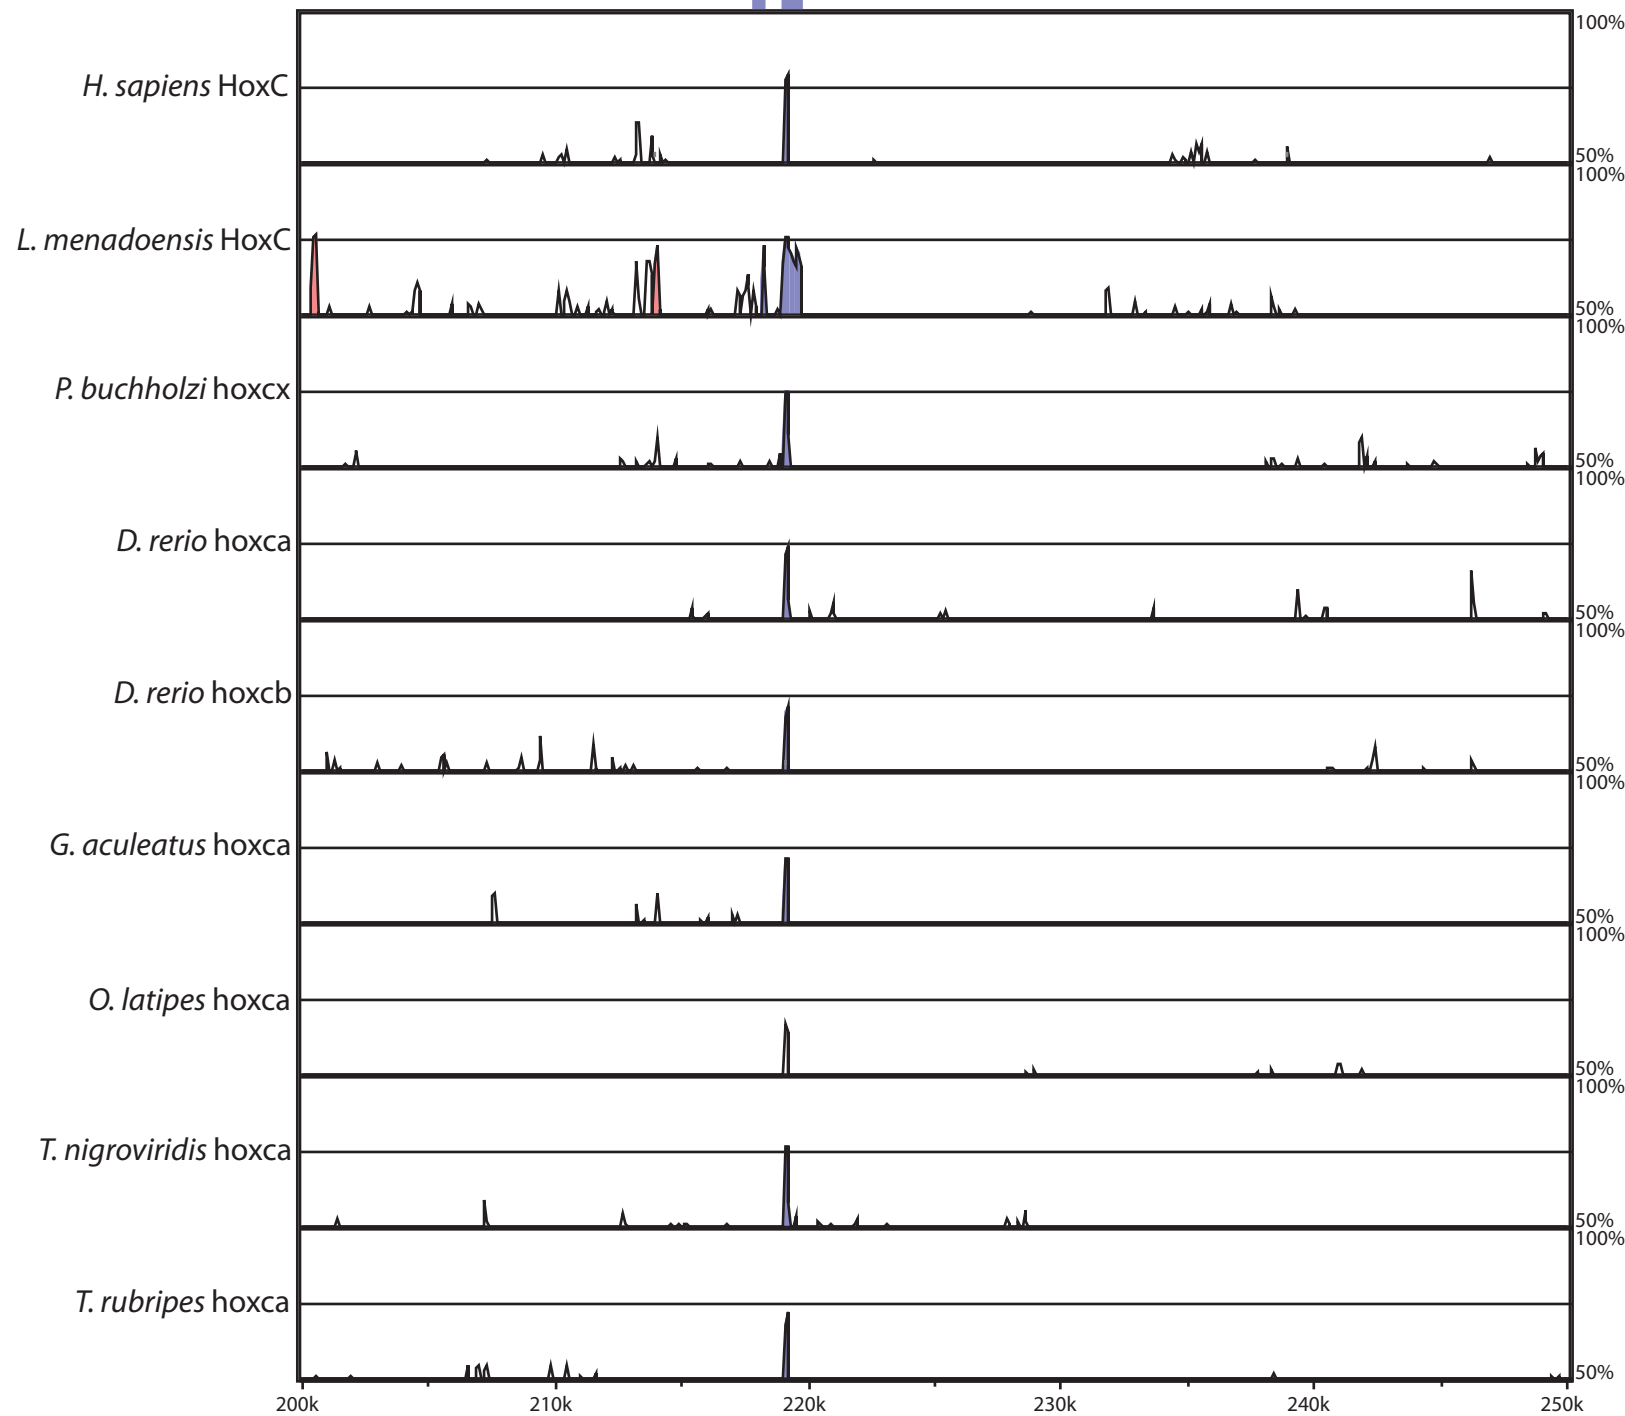

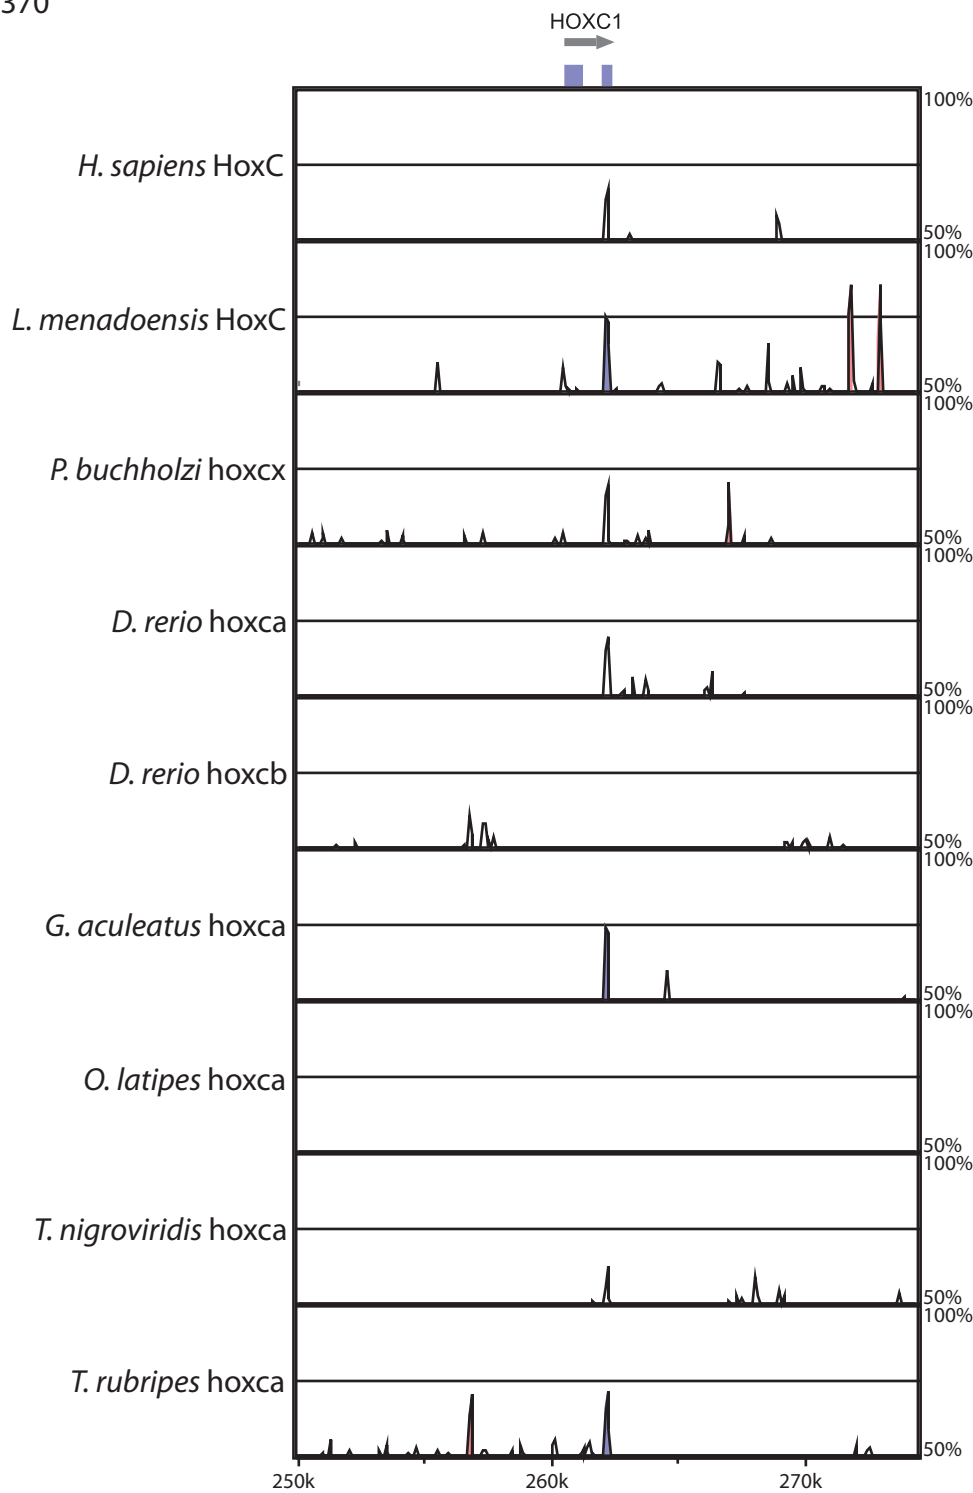

HoxD VISTA alignment with *C. milli* baseline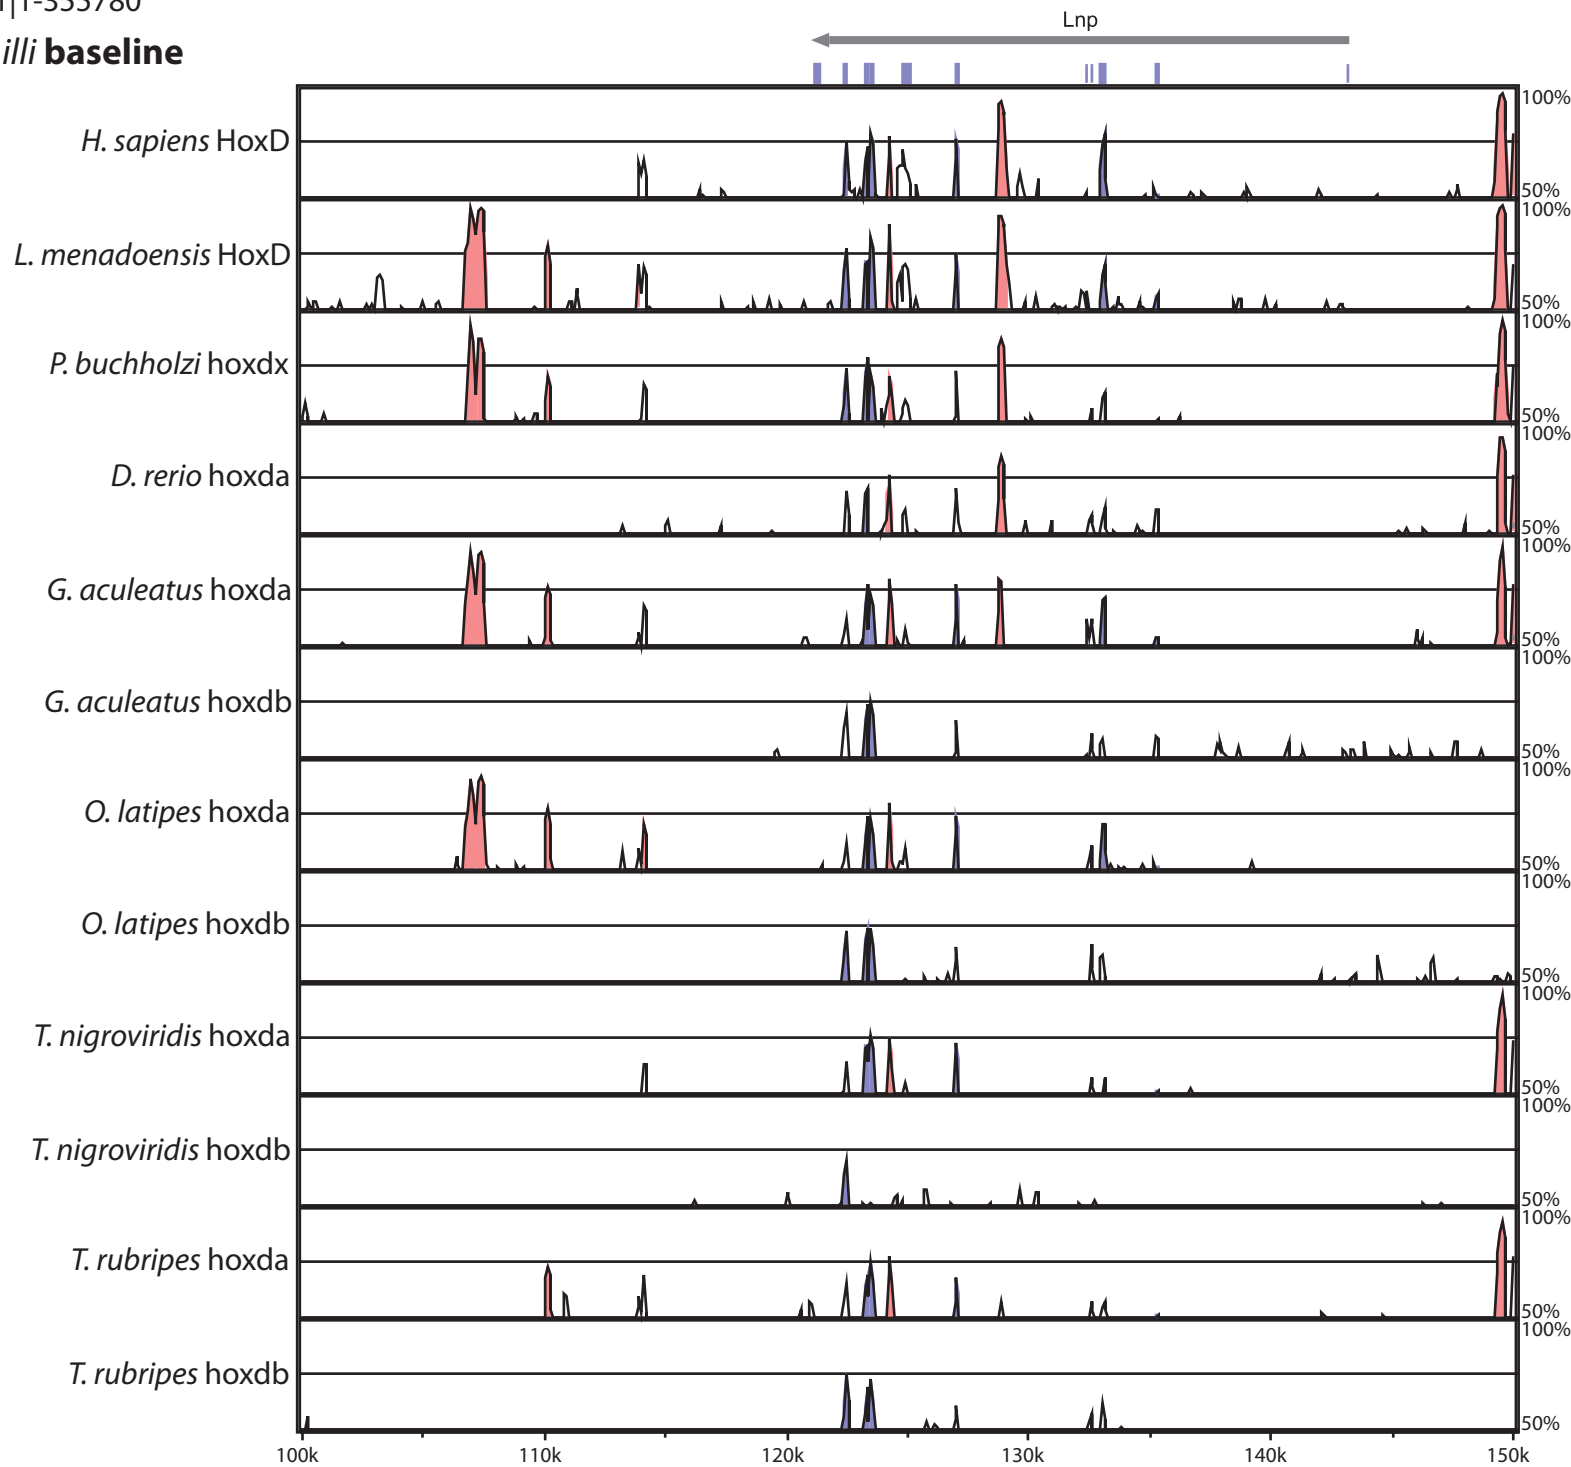



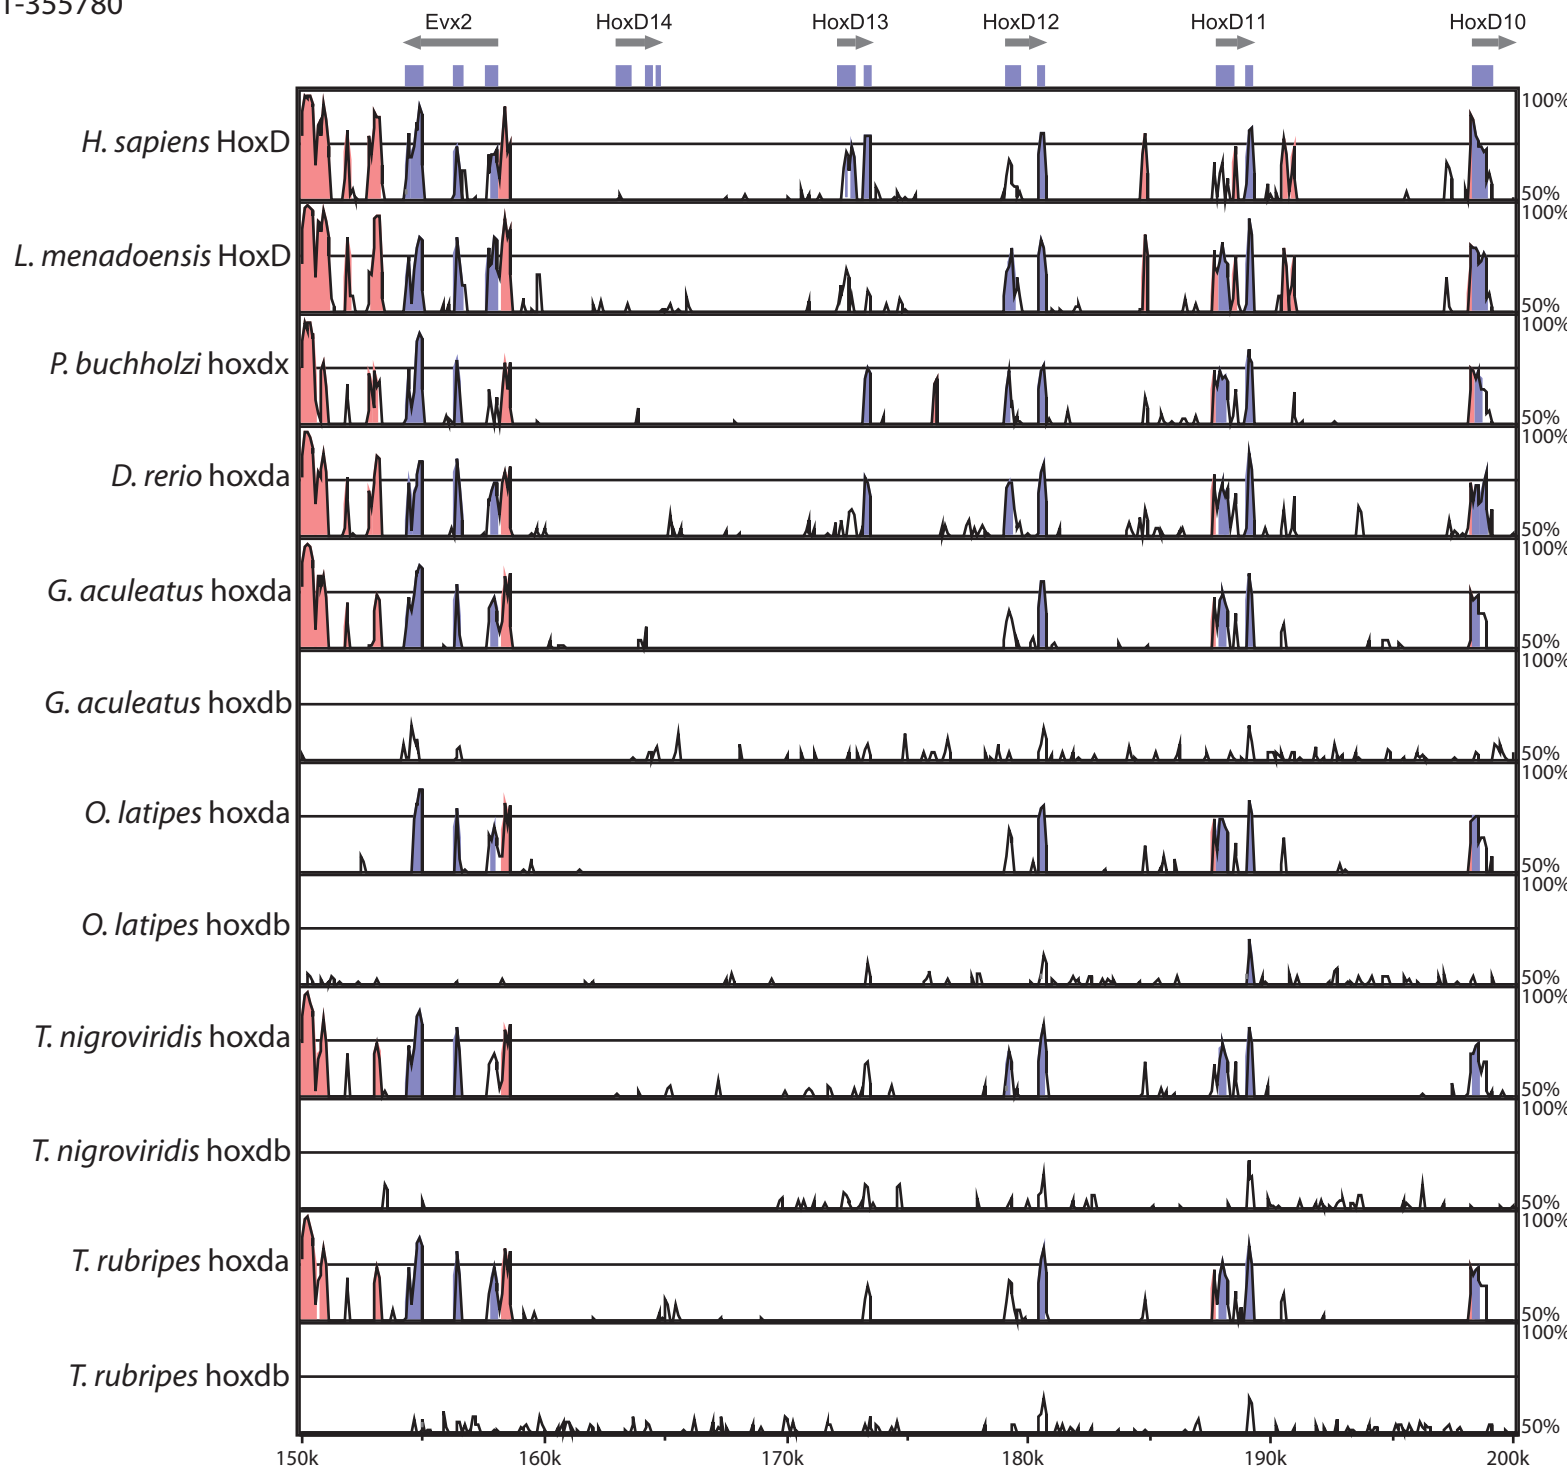

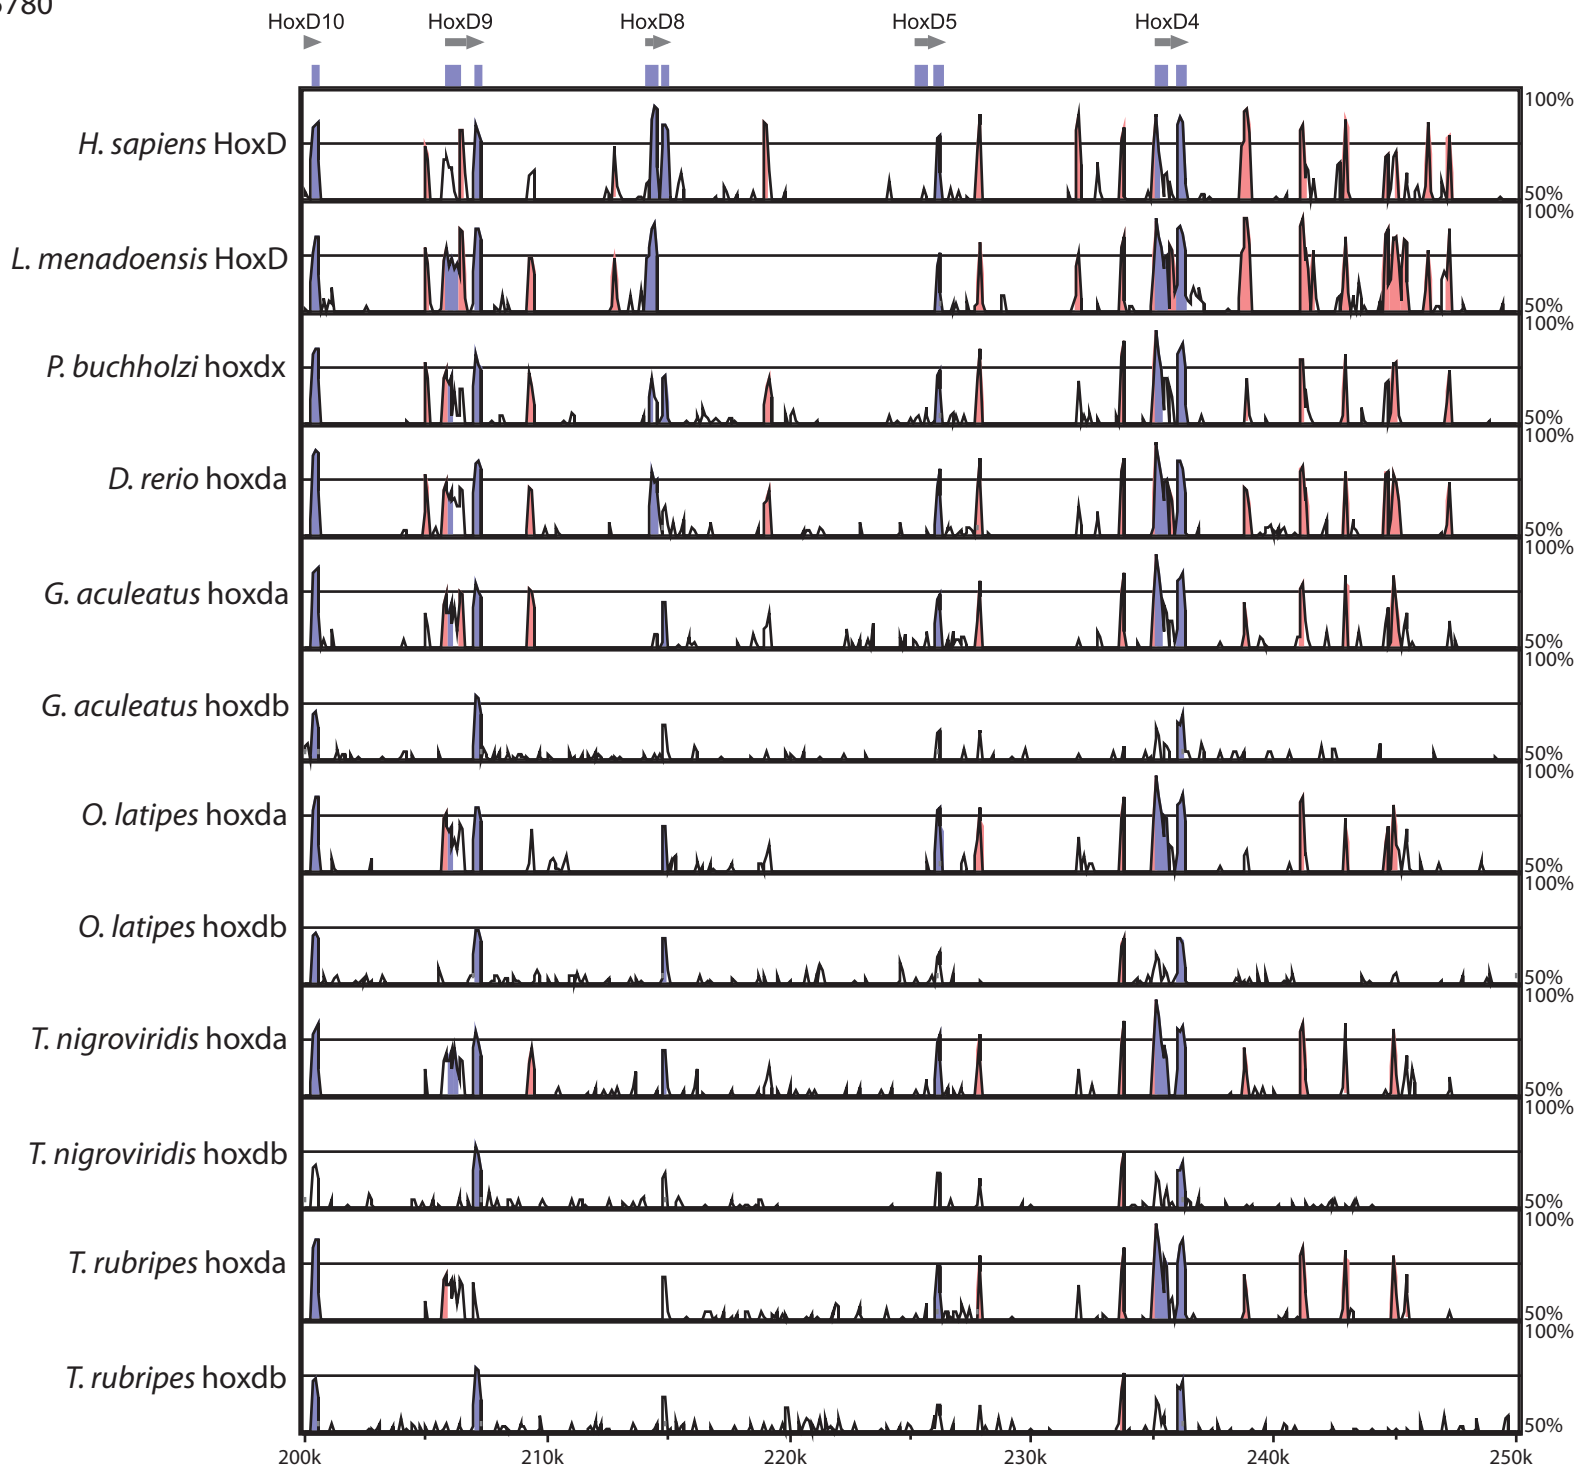

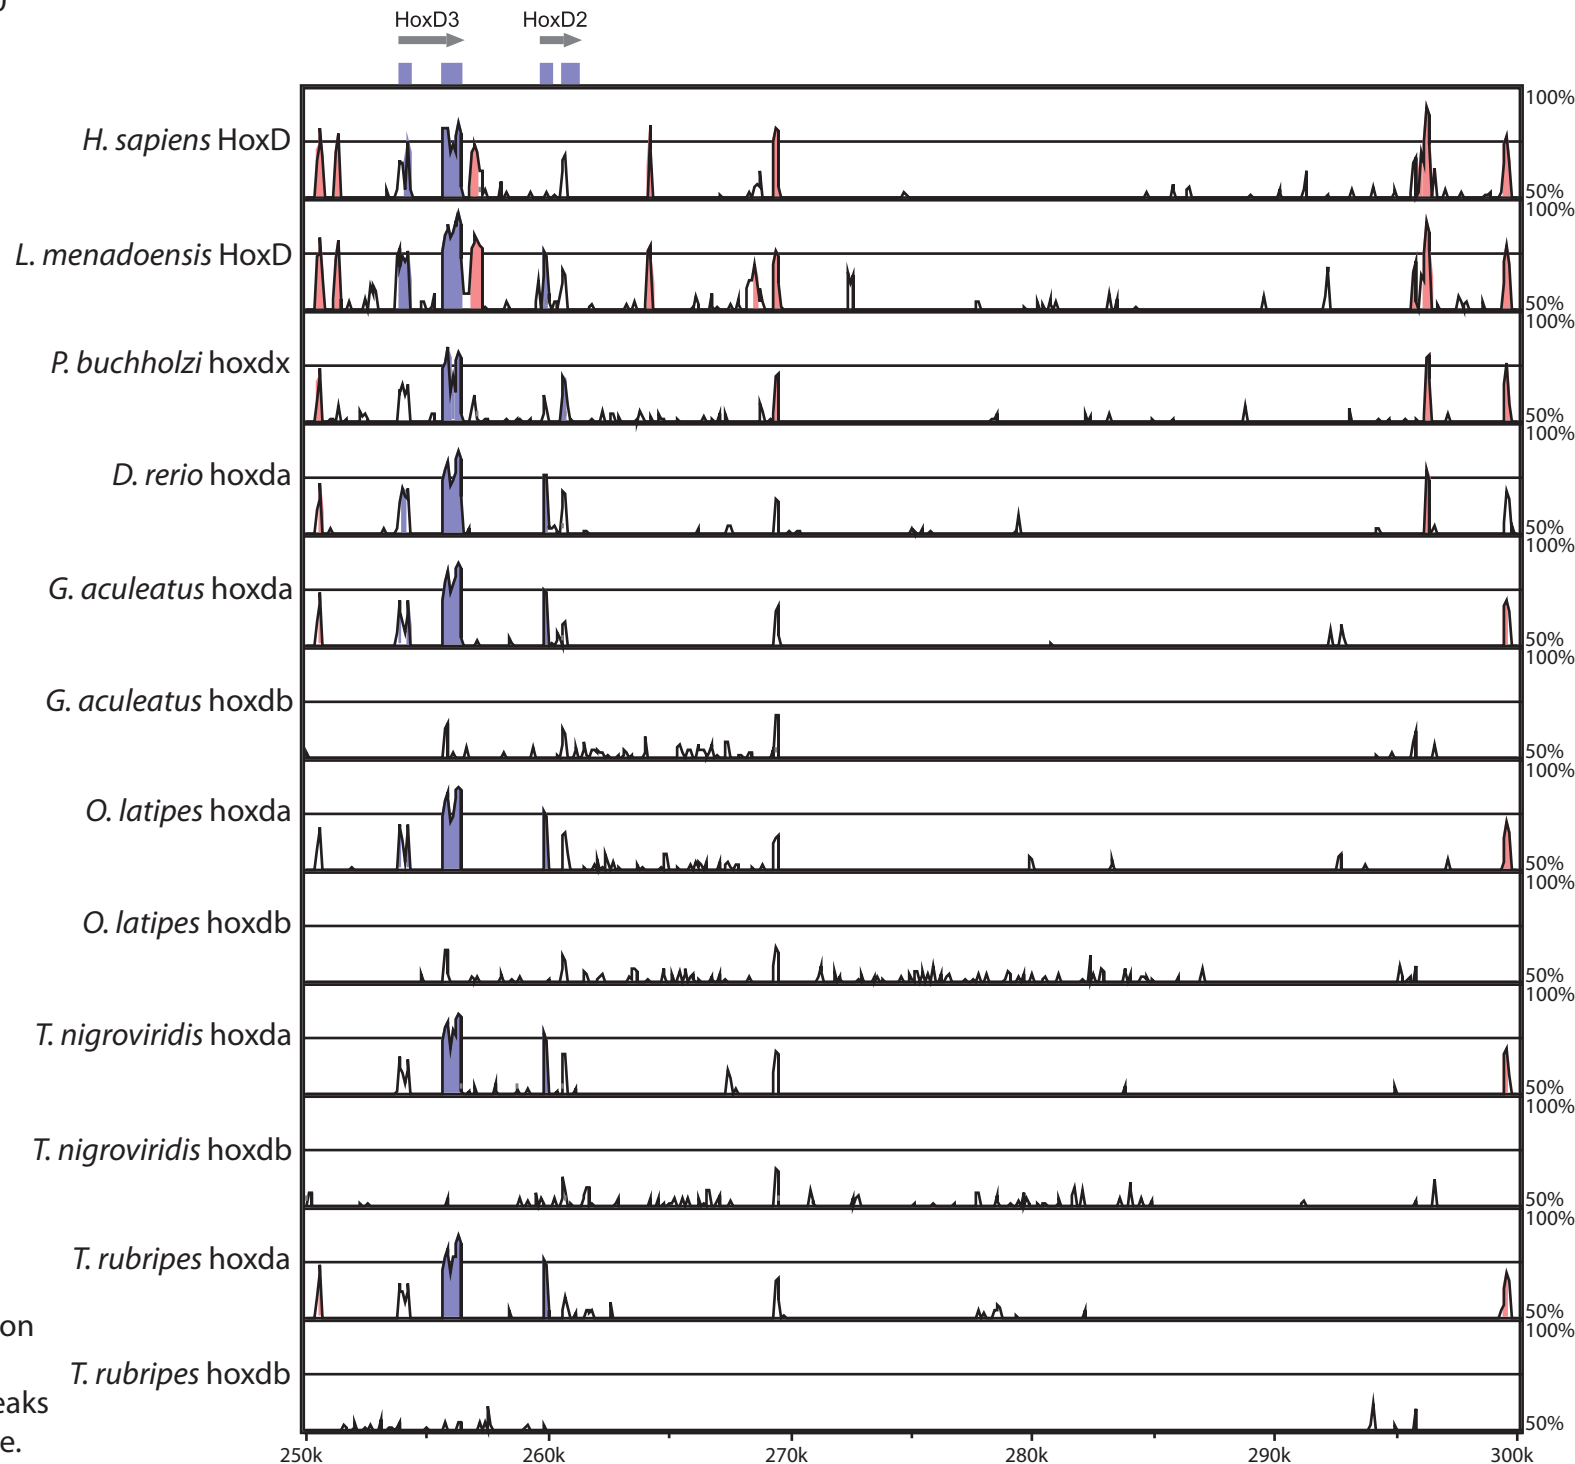

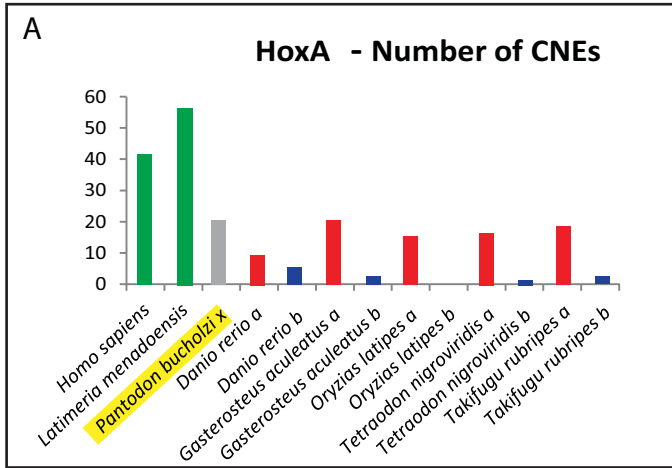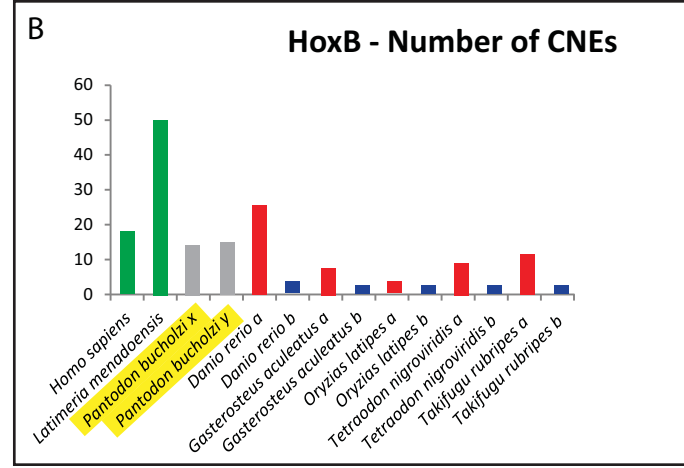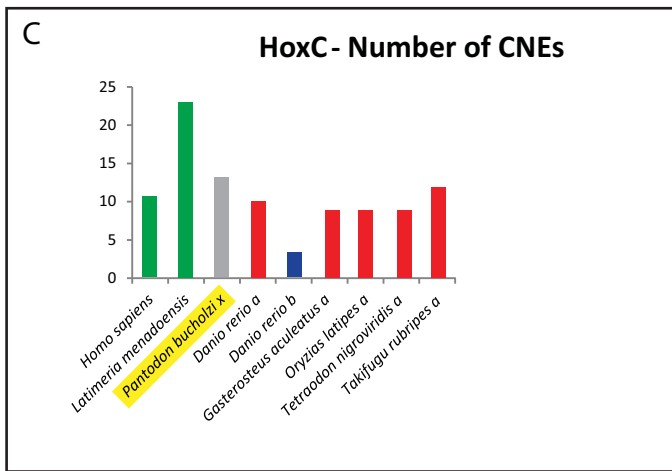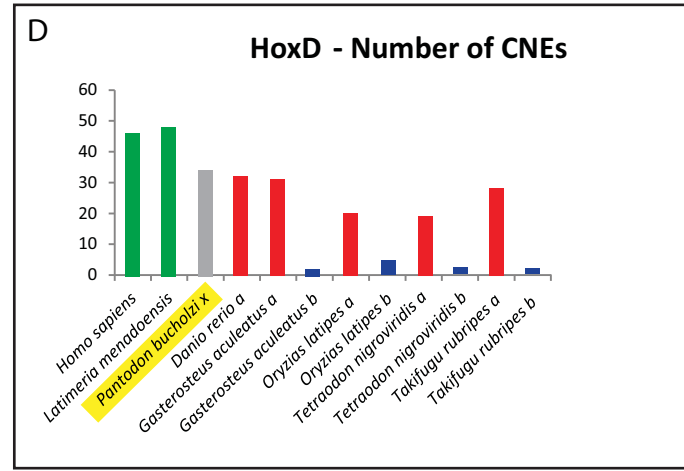

**Figure S4: Ancient CNE conservation.** Histograms showing the number of CNEs identified by multi VISTA alignment using *Callorhinchus milli* as the baseline sequence. The mLAGAN algorithm and a cutoff of 70% identity over 100bp was used. Columns corresponding to pre-TGD sarcopterygian Hox cluster CNE counts are represented in green, the post-TGD clupeocephalan 'a' cluster counts are in red, and the post-TGD clupeocephalan 'b' clusters are in blue. *Pantodon* Hox cluster CNE counts are coloured in gray. While extreme asymmetry in the retention of ancient CNEs between the post-TGD 'a' and 'b' clusters of other teleosts is evident, the *hoxbx* and *hoxby* clusters of *Pantodon* retain nearly equal numbers of ancient CNEs (B).
